# 1 Pathognomonic and epistatic genetic alterations in 2 B-cell non-Hodgkin lymphoma

3  
4 Man Chun John Ma<sup>1\*</sup>, Saber Tadros<sup>1\*</sup>, Alyssa Bouska<sup>2</sup>, Tayla B. Heavican<sup>2</sup>, Haopeng Yang<sup>1</sup>,  
5 Qing Deng<sup>1</sup>, Dalia Moore<sup>3</sup>, Ariz Akhter<sup>4</sup>, Keenan Hartert<sup>3</sup>, Neeraj Jain<sup>1</sup>, Jordan Showell<sup>1</sup>,  
6 Sreejoyee Ghosh<sup>1</sup>, Lesley Street<sup>5</sup>, Marta Davidson<sup>5</sup>, Christopher Carey<sup>6</sup>, Joshua Tobin<sup>7</sup>,  
7 Deepak Perumal<sup>8</sup>, Julie M. Vose<sup>9</sup>, Matthew A. Lunning<sup>9</sup>, Aliyah R. Sohani<sup>10</sup>, Benjamin J.  
8 Chen<sup>11</sup>, Shannon Buckley<sup>12</sup>, Loretta J. Nastoupil<sup>1</sup>, R. Eric Davis<sup>1</sup>, Jason R. Westin<sup>1</sup>, Nathan H.  
9 Fowler<sup>1</sup>, Samir Parekh<sup>8</sup>, Maher K. Gandhi<sup>7</sup>, Sattva S. Neelapu<sup>1</sup>, Douglas Stewart<sup>5</sup>, Javeed  
10 Iqbal<sup>2</sup>, Timothy Greiner<sup>2</sup>, Scott J. Rodig<sup>13</sup>, Adnan Mansoor<sup>5</sup>, Michael R. Green<sup>1,14,15\*</sup>

11 <sup>1</sup>Department of Lymphoma and Myeloma, Division of Cancer Medicine, The University of Texas MD  
12 Anderson Cancer Center, Houston, TX, USA; <sup>2</sup>Department of Pathology and Microbiology, University of  
13 Nebraska Medical Center, Omaha, NE, USA; <sup>3</sup>Eppley Institute for Research in Cancer and Allied  
14 Diseases, University of Nebraska Medical Center, Omaha, NE, USA; <sup>4</sup>Department of Pathology and  
15 Laboratory Medicine, University of Calgary, Calgary, AB, Canada; <sup>5</sup>Section of Hematology, Department of  
16 Medicine, University of Calgary, Calgary, AB, Canada; <sup>6</sup>Northern Institute for Research, Newcastle  
17 University, Newcastle upon Tyne, England; <sup>7</sup>Mater Research, University of Queensland, QLD, Australia;  
18 <sup>8</sup>Division of Hematology and Medical Oncology, Icahn School of Medicine at Mount Sinai, New York, NY,  
19 USA; <sup>9</sup>Department of Internal Medicine, Division of Hematology-Oncology, University of Nebraska  
20 Medical Center, Omaha, NE, USA; <sup>10</sup>Department of Pathology, Massachusetts General Hospital and  
21 Harvard Medical School, Boston, MA, USA; <sup>11</sup>Department of Pathology, University of Massachusetts  
22 Medical School, UMass Memorial Medical Center, Worcester, MA, USA; <sup>12</sup>Department of Genetics, Cell  
23 Biology and Anatomy, University of Nebraska Medical Center, Omaha, NE, USA; <sup>13</sup>Department of  
24 Pathology, Brigham and Womens Hospital, Boston, MA, USA; <sup>14</sup>Department of Genomic Medicine,  
25 University of Texas MD Anderson Cancer Center, Houston, TX, USA; <sup>15</sup>Center for Cancer Epigenetics,  
26 University of Texas MD Anderson Cancer Center, Houston, TX, USA.

27 <sup>‡</sup>Equally contributed

28 \*Corresponding Author

29 Michael R. Green, Ph.D.

30 Departments of Lymphoma/Myeloma and Genomic Medicine,

31 University of Texas MD Anderson Cancer Center,

32 1515 Holcombe Blvd, Unit 903,

33 Houston, TX 77030, USA

34 Ph.: +1-713-745-4244

35 Email: [mgreen5@mdanderson.org](mailto:mgreen5@mdanderson.org)

36

37

38

## 39 **KEY POINTS**

- 40 1. Genetic perturbation of the ubiquitin proteasome system is an emerging hallmark of B-
- 41 cell non-Hodgkin lymphoma (B-NHL).
- 42 2. Co-occurring sets of genetic alterations define B-NHL subtypes and likely represent
- 43 epistatic interactions.

44

## 45 **ABSTRACT**

46 B-cell non-Hodgkin lymphoma (B-NHL) encompasses multiple clinically and phenotypically  
47 distinct subtypes of malignancy with unique molecular etiologies. Common subtypes of B-NHL  
48 such as diffuse large B-cell lymphoma (DLBCL) have been comprehensively interrogated at the  
49 genomic level, but other less common subtypes such as mantle cell lymphoma (MCL) remain  
50 sparsely characterized. Furthermore, multiple B-NHL subtypes have thus far not been  
51 comprehensively compared to identify conserved or subtype-specific patterns of genomic  
52 alterations. Here, we employed a large targeted hybrid-capture sequencing approach  
53 encompassing 380 genes to interrogate the genomic landscapes of 755 B-NHL tumors at high  
54 depth; primarily including DLBCL, MCL, follicular lymphoma (FL), and Burkitt lymphoma (BL).  
55 We identified conserved hallmarks of B-NHL that were deregulated across major subtypes, such  
56 as the frequent genetic deregulation of the ubiquitin proteasome system (UPS). In addition, we  
57 identified subtype-specific patterns of genetic alterations, including clusters of co-occurring  
58 mutations that are pathognomonic. The cumulative burden of mutations within a single cluster  
59 were more significantly discriminatory of B-NHL subtypes than individual mutations, implicating  
60 likely patterns of genetic epistasis that contribute to disease etiology. We therefore provide a  
61 framework of co-occurring mutations that deregulate genetic hallmarks and likely cooperate in  
62 lymphomagenesis of B-NHL subtypes.

## 63 INTRODUCTION

64 Non-Hodgkin lymphomas (NHL) are a heterogeneous group of lymphoid malignancies that  
65 predominantly arise from mature B-cells (B-NHL). Although mature B-cell neoplasms  
66 encompass 38 unique diagnostic subtypes, over 85% of cases fall within only 7 subtypes<sup>1,2</sup>.  
67 Recent next generation sequencing (NGS) studies have shed light onto the key driver mutations  
68 in many of these NHL subtypes; for example, large studies of diffuse large B-cell lymphoma  
69 (DLBCL) have led to proposed genomic subtypes that have unique etiologies<sup>3-5</sup>. However, many  
70 less-common NHL subtypes such as mantle cell lymphoma (MCL) have not been as extensively  
71 characterized<sup>6,7</sup>. Furthermore, until recently<sup>3,4</sup> genetic alterations have been considered in a  
72 binary fashion as either driver events, which directly promote disease genesis or progression, or  
73 passenger events, which have little or no impact on disease biology. In contrast to this principle,  
74 most B-NHLs do not result from a single dominant driver but instead result from the serial  
75 acquisition of genetic alterations that cooperate in lymphomagenesis. The genetic context of  
76 each mutation therefore likely determines its oncogenic potential, and groups of mutations  
77 should therefore be considered collectively rather than as singular events. For example, the 'C5'  
78 and 'MCD' clusters identified in DLBCL by Chapuy *et al.* and Schmitz *et al.*, respectively, are  
79 characterized by the co-occurrence of *CD79B* and *MYD88* mutations<sup>3,4</sup>. In animal models, the  
80 *Myd88* L265P mutation was found to promote down-regulation of surface IgM and a phenotype  
81 resembling B-cell anergy<sup>8</sup>. However, this effect could be rescued by *Cd79b* mutation, showing  
82 that these co-occurring mutations are epistatic<sup>8</sup>. The characterization of other significantly co-  
83 occurring genetic alterations are therefore likely to reveal additional important epistatic  
84 relationships.

85

86 We approached this challenge by performing genomic profiling of 755 B-NHLs across different  
87 subtypes. Through this cross-sectional analysis we characterized genomic hallmarks of B-NHL

88 and identified pathognomonic genetic alterations, including disease-specific mechanisms for  
89 deregulating hallmark processes and protein complexes, and sets of significantly co-associated  
90 events that represent subtype-specific epistatic genetic alterations. This study therefore  
91 provides new insight into how cooperating genetic alterations may contribute to molecularly and  
92 phenotypically distinct subtypes of B-NHL.

93

## 94 **METHODS**

95 An overview of our approach is shown in Figure S1. For detailed methods, please refer to  
96 supplementary information.

97

### 98 Tumor DNA samples

99 We collected DNA for 755 B-NHL tumors, including 199 follicular lymphoma (FL), 196 mantle  
100 cell lymphoma (MCL), 148 diffuse large B-cell lymphoma (DLBCL), 108 Burkitt's lymphoma  
101 (BL), 45 chronic lymphocytic leukemia / small lymphocytic lymphoma (CLL/SLL), 24 marginal  
102 zone lymphoma (MZL), 21 high-grade B-cell lymphoma not otherwise specified (HGBL-NOS),  
103 and 14 high-grade B-cell lymphoma with MYC, BCL2 and/or BCL6 rearrangement (DHL) (Table  
104 S1). A total of 502 samples were obtained from the University of Nebraska Medical Center, and  
105 were prioritized for inclusion in this study if they had fresh/frozen tissue available (n=577) and  
106 been previously interrogated by Affymetrix U133 Plus 2.0 gene expression microarrays  
107 (n=290)<sup>9-11</sup>. An additional series of 178 formalin-fixed paraffin-embedded (FFPE) tumors were  
108 collected from other centers. Samples were de-identified but accompanied by their diagnosis  
109 from medical records, plus overall survival time and status (alive, dead) when available. Medical  
110 record diagnosis was used in all cases except for those with fluorescence *in situ* hybridization  
111 showing translocations in MYC and BCL2 and/or BCL6, which were amended to DHL.

112 Sequencing results for a subset of 52 BL tumors was described previously<sup>12</sup>. All MCL samples  
113 were either positive for *CCND1* translocation by FISH or positive for *CCND1* protein expression  
114 by IHC, depending on the diagnostic practices of the contributing institution.

115

#### 116 Next generation sequencing

117 A total of 100-1000ng of gDNA was sonicated using a Covaris S2 Ultrasonicator, and libraries  
118 prepared using KAPA Hyper Prep Kits (Roche) with TruSeq Adapters (Bioo Scientific) and a  
119 maximum of 8 cycles of PCR (average of 6 cycles). Libraries were qualified by TapeStation  
120 4200, quantified by Qubit and 10- to 12-plexed for hybrid capture. Each multiplexed library was  
121 enriched using our custom LymphoSeq panel encompassing the full coding sequences of 380  
122 genes that have previously been reported to be somatically mutated in B-cell lymphoma<sup>6,7,13-32</sup>  
123 (Table S2, Supplementary Methods), as well as tiling recurrent translocation breakpoints.  
124 Enrichments were amplified with 4-8 cycles of PCR and sequenced on a single lane of an  
125 Illumina HiSeq 4000 with 100PE reads in high-output mode at the Hudson Alpha Institute for  
126 Biotechnology or the MD Anderson Sequencing and Microarray Facility. Variants were called  
127 using our previously validated ensemble approach<sup>12,21</sup>, copy number alterations identified using  
128 off-target reads with the CopyWriteR tool<sup>33</sup>, and translocation called using FACTERA<sup>34</sup>.  
129 Germline polymorphisms were filtered using dbSNP annotation and the EXAC dataset  
130 containing 60,706 healthy individuals<sup>35</sup>. Significantly mutated genes were defined by  
131 MutSig2CV<sup>36</sup>, significant DNA copy number alterations by GISTIC2<sup>37</sup>, and the clonal  
132 representation of mutations by ABSOLUTE<sup>38</sup>. Mutation and CNA data are publicly viewable  
133 through cBioPortal: [https://www.cbioportal.org/study/summary?id=mbn\\_mdacc\\_2013](https://www.cbioportal.org/study/summary?id=mbn_mdacc_2013). For  
134 further details, refer to supplementary methods.

135

## 136 RESULTS

### 137 Recurrently mutated genes highlight conserved functional hallmarks of B-NHL

138 We used a 380 gene custom targeted sequencing approach to interrogate the genomes of 755  
139 mature B-NHLs, sequencing to an average depth of 599X (Min, 101X; Max, 1785X; Table S1)  
140 for a total yield of 2.06 Tbp. Somatic nucleotide variants (SNVs) and small insertions/deletions  
141 (InDels) were identified using an ensemble approach that we have previously validated<sup>21</sup> (Table  
142 S3) and significantly mutated genes were identified using MutSig2CV (Table S4). Genes that  
143 were significantly mutated in the full cohort or in any one of the 4 subtypes with >100 tumors  
144 (BL, DLBCL, FL, MCL), as well as frequently mutated genes that are targets of AID (Table S5,  
145 **Figure 1**), were included in downstream analyses. Mutation distributions were classified using a  
146 novel metric that classifies them into hotspot, clustered or diffuse (Figure S2). The residue of  
147 mutational hotspots and conserved domains targeted by clustered mutations are shown on  
148 figure 1. As a proof of principle, genes such as *EZH2* and *MYD88* with known mutational  
149 hotspots were classified as 'hotspot', and genes such as *CREBBP* and *TCF3* that accumulate  
150 mutations within a single domain were classified as 'clustered'. The mutational burden  
151 calculated from our targeted region significantly correlated with that from the whole exome  
152 (Figure S3A) and was significantly higher in DLBCL and other high-grade tumors compared to  
153 FL and MCL (**Figure 1**; Figure S3B). The mutational signatures were also different between  
154 malignancies, but were predominated by mutations attributable to failure of double-strand break  
155 repair by homologous recombination<sup>39</sup> (Signature 3; Table S6).

156

157 To identify key hallmarks that are deregulated by somatic mutations, we grouped genes using  
158 DAVID functional annotation clustering<sup>40</sup>. *BCL6* function is not annotated in gene sets within  
159 public databases, but was an obvious feature of the recurrently mutated genes, so this hallmark

160 was assigned according to literature support. The most frequently perturbed processes were  
161 chromatin modification and cell signaling, with most of the genes in these categories having  
162 been well described in prior reports. Chromatin modifying genes were mutated in 68% of BL,  
163 66% of DLBCL, 91% of FL and 45% of MCL, and included those that encode proteins that  
164 catalyze post-translational modifications of histones (*KMT2D*, *CREBBP*, *EZH2*, *EP300*,  
165 *WHSC1*, *ASHL1L* and *KMT2A*), components of the SWI/SNF chromatin remodeling complex  
166 (*ARID1A*, *SMARCA4*, *BCL7A*), linker histones (*HIST1H1E*, *HIST1H1C*, *HIST1H1B*), and the  
167 *TET2* gene. Genes with a role in signaling included those involved in B-cell receptor (*CD79B*,  
168 *ID3*, *TCF3*, *RFTN1*), toll-like receptor (*MYD88*), NF $\kappa$ B (*TNFAIP3*, *CARD11*, *NFKBIE*), Notch  
169 (*NOTCH1*, *NOTCH2*), JAK/STAT (*SOCS1*, *STAT6*), PI3K/mTOR (*FOXO1*, *ATP6V1B2*,  
170 *APT6AP1*) and G-protein (*GNA13*, *GNAI2*) signaling. The *CD79A* and *BCL10* genes were also  
171 mutated at a lower frequency that was not significant by MutSig (Figure S4A-B). Among these,  
172 the *RFTN1* gene (Figure S4C) is a novel recurrently mutated gene that was mutated in 7.4% of  
173 DLBCL and encodes a lipid raft protein that is critical for B-cell receptor signaling<sup>41</sup>.

174

175 Other processes that are not as well described as genetic hallmarks of B-NHL included BCL6  
176 function and the ubiquitin proteasome system (UPS). Genes associated with BCL6 function  
177 encompassed BCL6 itself and its interacting proteins (*BCL6*, *TBL1XR1*, *BCOR*, *SPEN*),  
178 regulators of BCL6 activity or expression (*MEF2B*, *IRF8*, *IRF4*), and a critical BCL6 target gene  
179 (*PRDM1*). Recurrent mutations of the *NCOR1* and *NCOR2* genes that encode BCL6 co-  
180 repressor proteins were also observed (Figure S4D-E), but were not significant by MutSig2CV.  
181 Multiple recurrently mutated chromatin modifying genes have also been implicated in BCL6  
182 function and therefore also contribute to this hallmark, including *CREBBP* and *EZH2*<sup>42,43</sup>. The  
183 recurrently mutated UPS genes included the *CDC27* gene, which encodes an E3 ligase for  
184 CCND1<sup>44</sup> that is mutated in 14% of MCL and has not been previously described in the literature.

185 The *TMEM51* gene was also identified as a novel recurrently mutated gene in 9% of BL, though  
186 the function of this gene is poorly defined. The cross-sectional analysis of multiple lymphoma  
187 subtypes therefore identified conserved hallmarks that are recurrently targeted by somatic  
188 mutations in B-NHL.

189

#### 190 Enrichment of functional hallmarks by structural alterations

191 The hybrid capture probes utilized in our design also targeted recurrent breakpoint regions in  
192 the immunoglobulin heavy- and light-chain loci, as well as the regions of recurrent breakpoints  
193 in or near the *BCL2*, *MYC* and *BCL6* genes. Translocations were called using a method that  
194 detects discordantly mapped reads<sup>34</sup> and our prior validation of this approach in cases with  
195 matched fluorescence in situ hybridization (FISH) data for *MYC* showed that it is 100% specific,  
196 but only ~40% sensitive for translocation detection<sup>12</sup>. In addition, we failed to detect *CCND1*  
197 translocations using this approach. However, we did observe a significantly higher fraction of  
198 *BCL6* translocations (57% [27/47]) partnered to non-immunoglobulin loci (eg. *CIITA*, *RHOH*,  
199 *EIF4A2*, *ST6GAL1*; Table S7) compared to *BCL2* (1% [1/114]) and *MYC* (5% [2/38])  
200 translocations (**Figure 2A**; Fisher P-value <0.001). These were more frequent in FL (88%  
201 [15/17] of *BCL6* translocations) as compared to DLBCL (39% [9/23] of *BCL6* translocations),  
202 presumably because the two immunoglobulin loci in FL are either translocated with the *BCL2*  
203 gene or functioning in immunoglobulin expression<sup>45</sup>. We also employed off-target reads to  
204 detect DNA copy number alterations (CNAs) in a manner akin to low-pass whole genome  
205 sequencing, identified significant peaks of copy gain and losses using GISTIC2<sup>37</sup> (**Figure 2A**;  
206 Figure S5; Table S8-9), and defined the likely targets of these CNAs by integrative analysis of  
207 matched gene expression profiling (GEP) data from 290 tumors (**Figure 2B-C**, Figure S5, Table  
208 S10-11). This identified known CNA targets (**Figure 2D**), including but not limited to deletion of  
209 *TNFAIP3* (6q24.2)<sup>46</sup>, *ATM* (11q22.3)<sup>47</sup>, *B2M* (15q15.5)<sup>48</sup> and *PTEN* (10q23.21)<sup>49</sup>, and copy gain



210 of *REL* and *BCL11A* (2p15), and *TCF4* (18q23)<sup>50</sup>. In addition, we identified novel targets such  
211 as deletion of *IBTK* (6q14.1), *UBE3A* (11q22.1) and *FBXO25* (8p23.3), and copy gain of *ATF7*  
212 (12q13.13), *UCHL5* (1q31.3), and *KMT2A* (11q23.3). Several CNA peaks, defined as the  
213 smallest and most statistically significant region, included genes that were significantly mutated  
214 (**Figure 2E**) as well as other genes for which we detected mutations at lower frequencies that  
215 were not significant by MutSig (*POU2AF1*, *TP53BP1*, *FAS*, *PTEN*). Furthermore, for several of  
216 these genes (*ATM*, *B2M*, *BIRC3* and *TNFRSF14*), deletions were significantly co-associated  
217 with mutations, suggesting that deletion and mutation are complementary mechanisms  
218 contributing to biallelic inactivation.

219  
220 Analyzing targets of translocations and CNAs added to enrichment of functional categories that  
221 we observed within recurrently mutated genes, including chromatin modification (*BCL11A*) and  
222 signaling (*TCF4*, *PTEN*). This was most prominently observed for genes with a role in apoptosis  
223 and the cell cycle (*CDKN2A*, *CDKN2B*, *FAS*, *RPL5*, *DFFB*, *MDM2*, *CDK6*) and the UPS  
224 (*CUL4A*, *FBXO25*, *IBTK*, *RNF38*, *UBAP1*, *UBE3A*, *UBQLN1*, *UCHL5*). Recurrently altered UPS  
225 genes collectively promote or suppress the abundance or activity of proteins with roles in other  
226 hallmark characteristics (**Figure 3A**). For example; *SOCS1*<sup>51</sup>, *BIRC3*<sup>52</sup>, *DTX1*<sup>53,54</sup>, *IBTK*<sup>55</sup>,  
227 *TRIM13*<sup>56</sup>, *TNFAIP3*<sup>53</sup> and *UBE3A*<sup>53</sup> all inhibit the function of proteins with a role in important B-  
228 cell signaling pathways (**Figure 3B**), thereby establishing a functional link between genetic  
229 alteration of the UPS and deregulation of signaling and adding an additional layer to the  
230 mechanisms by which B-cell receptor signaling is perturbed in B-NHL. The combined analysis of  
231 mutations and structural alterations therefore identified large sets of genes that are targeted by  
232 genetic alterations and collectively contribute to hallmark features that are commonly  
233 deregulated across multiple B-NHL subtypes.

234

235

236 Disease-specific patterns of genetic alterations

237 Some interesting patterns of disease-specificity were obvious for both mutations and structural  
238 alterations. We therefore formally tested the over- or under-representation of these events in  
239 each of the 4 subtypes with >100 tumors (BL, DLBCL, FL, MCL), compared to all other tumors  
240 in the study (**Figure 4**; Table S12). Using matched GEP data for a subset of cases (Table S1),  
241 we also tested the association between genetic alterations and molecularly-defined Burkitt's  
242 lymphoma subtypes (n=154; Figure S6-7, Table S13), as well as DLBCL cell of origin subtypes  
243 (n=98; Figure S7, Table S14). These analyses showed that the genetic alterations associated  
244 with clinically-defined BL were also associated with molecularly-defined BL. Moreover, genetic  
245 alterations that we and others have characterized as being over-represented in ABC-like DLBCL  
246 such as *CD79B* mutation<sup>57</sup>, *MYD88* mutation<sup>58</sup> and *TCF4* copy gain<sup>50</sup> were significantly over-  
247 represented in this analysis also.

248

249 We observed some interesting patterns within hallmark characteristics that differ between  
250 subtypes. For example, linker histone mutations were present in germinal center B (GCB)-cell  
251 derived malignancies (BL, DLBCL, FL) at variable frequencies, but were largely absent from  
252 MCL (Figure S8). In contrast, mutations of genes encoding the H3K36 methyltransferases,  
253 *WHSC1* (aka *MMSET/NSD2*) and *ASH1L*, were frequent in MCL and largely absent from GCB-  
254 derived malignancies. We also noted that the SWI/SNF complex was perturbed in different ways  
255 in different diseases (**Figure 5**). Specifically, mutations of the *SMARCA4* (aka. BRG1)  
256 component of the ATPase module were significantly enriched in BL (24%) compared to other  
257 subtypes (4%, Q-value<0.001), while mutations of the *BCL7A* component of the ATPase  
258 module were significantly enriched in FL (11%) compared to other subtypes (4%, Q-

259 value=0.007). In contrast, mutations of *ARID1A* were frequent in both BL (19%) and FL (15%),  
260 and DNA copy number gains of *BCL11A* were frequent in both DLBCL (28%) and FL (22%).  
261 The SWI/SNF complex is therefore a target of recurrent genetic alterations, as previously  
262 suggested<sup>59</sup>, but the manner in which this complex is perturbed varies between B-NHL subtypes  
263 **(Figure 5)**. Similar disease-specific patterns were also observed for signaling genes; for  
264 example, *TCF3* and *ID3* have important functions in normal germinal center B-cells<sup>60</sup>, but  
265 mutations of these genes are specifically enriched within BL and are rarely found in the other  
266 GCB-derived malignancies, DLBCL and FL. Similarly, the *ATP6AP1* and *ATP6V1B2* genes that  
267 function in mTOR signaling<sup>61,62</sup> are specifically mutated in FL, and the *DUSP2* gene which  
268 inactivates ERK1/2<sup>63</sup> and STAT3<sup>64</sup> is specifically mutated in DLBCL. The disease-specific  
269 patterns of genetic alterations therefore reveal subtle but important differences in how each  
270 subtype of B-NHL perturbs hallmark features.

271

#### 272 Pathognomonic sets of co-associated genomic alterations in B-NHL subtypes

273 We next defined how each genetic alteration co-associated with or mutually-excluded other  
274 genetic alterations by pairwise assessments using false-discovery rate (FDR)-corrected Fisher's  
275 tests (Table S15). A matrix of the transformed FDR Q-values (-logQ) was used for unsupervised  
276 hierarchical clustering to identify clusters of co-associated genetic alterations. Together with  
277 patterns of disease-specificity, unsupervised clustering revealed clear groupings of co-  
278 associated events for BL, DLBCL, FL and MCL **(Figure 4)**. We identified a single cluster that  
279 was specifically enriched in DLBCL, included co-associated genetic alterations that were over-  
280 represented in the ABC-like, and overlapped with the previously described C5/MCD clusters<sup>3,4</sup>.  
281 We also identified a cluster consisting of TP53 mutations and multiple CNAs similar to the C2  
282 subtype reported in DLBCL, but which was enriched in both FL and DLBCL. A cluster with  
283 features similar to the C3/EZB DLBCL clusters was also observed, but was specifically enriched

284 in FL. The remaining two previously reported DLBCL clusters (C1/N2 and C4) were not  
285 observed in this analysis, which may be a result of the different clustering strategies used and/or  
286 the lower number of DLBCL tumors in this study compared to other prior DLBCL-focused  
287 efforts<sup>3,4</sup>. We therefore focused our subsequent description on BL, FL and MCL.

288

289 The core set of co-associated genetic alterations in BL were *MYC* translocation and mutation,  
290 and mutations of *SMARCA4*, *CCND3* and *ID3*. Mutations of *GNAI2*, *GNA13*, *FOXO1*, *TCF3*,  
291 *ARID1A* and *TMEM51* were also clustered with this core set, but were present at lower  
292 frequencies. Mutations of *TP53* and copy gain of 1q were frequent in BL, but did not cluster  
293 together with other BL-associated genetic alterations. The core set of genetic alterations in FL  
294 were *BCL2* translocations and mutations, and mutations of *KMT2D*, *CREBBP* and *EZH2*, in line  
295 with prior observations<sup>16,21</sup>. Copy loss of 10q23.31 encompassing the *FAS* and *PTEN* genes,  
296 and mutations *EEF1A1*, *TNFRSF14*, *IRF8*, *BCL7A*, *ATP6V1B2* and *ATP6AP1* were present at  
297 lower frequencies and clustered with this core set. The MCL cluster included mutations and  
298 deletions of *ATM* and *BIRC3*, as well as frequent deletions of 9p21.32 (*CDKN2A* and *CDKN2B*),  
299 9q21.3 (*UBQLN1*), 13q14.2 (miR-15a/16 and *TRIM13*), 13q34 (*CUL4A* and *ING1*), and 1p21  
300 (*RPL5*). Mutation of *BCOR*, *UBR5*, *SP140*, *CCND1* and *WHSC1* were also significantly over-  
301 represented in MCL compared to other subtypes, and were associated with this cluster. These  
302 data show that different subtypes of B-NHL are defined by characteristic sets of co-associated  
303 genetic alterations that affect multiple hallmarks.

304

### 305 Combinations of clonal genetic alterations define B-NHL subtypes

306 Our data have revealed statistical enrichment of individual genetic alterations in subtypes of B-  
307 NHL, and pairwise relationships between different genetic alterations that define clusters of

308 subtype-specific events. However, individual genetic alterations from disease-specific clusters  
309 are also observed at variable frequencies in other B-NHL subtypes (**Figure 6A**). We therefore  
310 investigated whether the combination of multiple genetic alterations from each cluster, rather  
311 than the presence or absence of a single alteration, were pathognomonic. By enumerating the  
312 number of genetic alterations from each disease-specific cluster in each tumor, we found that  
313 this was indeed the case. Specifically over half of all BL, FL and MCL tumors possessed  $\geq 3$   
314 genetic alterations defined by their respective subtype-specific clusters (**Figure 6**). These rates  
315 were significantly higher than those observed in other diseases (Fisher P < 0.001 for all  
316 comparisons). For example, DLBCL and FL share many of the same recurrently mutated genes,  
317 particularly when considering the C3/EZB subtype of DLBCL<sup>3,4</sup>. Thus, one or more FL cluster  
318 alterations are found in 93% of FL tumors, but also in 54% of DLBCL tumors. However, FL  
319 tumors have a significantly higher rate of accumulation of these mutations, with 68% of FL  
320 tumors bearing  $\geq 3$  of the FL cluster alterations but only 18% of DLBCL tumors bearing  $\geq 3$  of  
321 these genetic alterations (Fisher P < 0.001). This pattern is also conserved for the BL and MCL  
322 clusters, for which the rate of acquiring  $\geq 3$  of the cluster alterations was significantly higher in BL  
323 or MCL compared to other subtypes of B-NHL, respectively. Thus, B-NHL subtypes are defined  
324 by the acquisition of multiple genetic alterations from subtype-associated clusters.

325

326 The co-association of multiple mutations may be suggestive of a clonal structure in which early  
327 driver mutations are clonal and later driver mutations are present in sub-clones. We therefore  
328 utilized ABSOLUTE (Table S16-18) to determine whether co-associated genetic alterations are  
329 present at different clonal fractions, and could therefore be phased to create clonal hierarchies.  
330 This analysis failed for a small subset of cases and could not be performed for X-linked genes  
331 or translocations. However, it clearly revealed the majority of co-associated genetic alterations  
332 were present at cancer cell fractions (CCF) > 0.9, which is indicative that each mutation is

333 clonally represented in every cancer cell at the time of sampling. These data suggest that  
334 combinations of mutations may therefore be required for effective expansion of lymphoma cells,  
335 such that common precursor cells (CPCs) are not detectable within the clonal structure of the  
336 clinically-detected tumor. These data therefore support the premise of epistatic interactions  
337 between co-occurring genetic alterations in B-NHL.

338

## 339 **DISCUSSION**

340 By performing cross-sectional genomic profiling of a large cohort of tumors, we have defined  
341 genes and functional hallmarks that are recurrently targeted by genetic alterations and showed  
342 that combinations of genetic alterations are disease-defining features of B-NHL subtypes. Some  
343 of the functional hallmarks that we identified have been previously appreciated in other  
344 diseases, with a few exceptions. For example, the mutation of genes with roles in chromatin  
345 modification are known to be a hallmark of FL<sup>65</sup> and we observed that over 90% of FLs  
346 possessed mutations in one or more of the genes in this category. However, these mutations  
347 were also observed in two thirds of BL and DLBCL tumors and nearly half of MCLs. There are  
348 subtype-specific patterns of chromatin modifying gene alterations, such as those that we  
349 described for H3K36 methylation in MCL and the unique patterns of SWI/SNF mutations across  
350 GCB-derived B-NHLs. But we suggest that the genetic deregulation of chromatin modification  
351 should be considered a general hallmark of B-NHL. In addition, we suggest that the  
352 deregulation of BCL6 function and perturbation of the ubiquitin proteasome system are  
353 hallmarks of B-NHL that require further investigation. We have highlighted some of the known  
354 substrates of recurrently altered UPS genes from the literature, which shows the potential for  
355 these genetic alterations to contribute to aberrant B-cell receptor signaling and proliferation.  
356 However, many of the genes within these categories have not been functionally studied in the

357 context of B-cell lymphoma, which represents a significant gap in our understanding of disease  
358 etiology.

359

360 The role of epistatic interactions between co-occurring genetic alterations is also an emerging  
361 field that requires further investigation. These interactions are not uncommon in cancer<sup>66</sup>, but  
362 our data show that they are pervasive and disease-defining features of the B-NHL genetic  
363 landscape. Epistasis between co-associated genetic alterations identified in this study requires  
364 formal validation in cell line and/or animal models. However, there are many instances in which  
365 co-occurring genetic alterations that we observed have already been shown to cooperate in  
366 lymphomagenesis. In addition to the aforementioned example of *MYD88* and *CD79B* mutations,  
367 transgenic mouse models of *Ezh2* activating mutations or conditional deletion of *Crebbp* or  
368 *Kmt2d* have shown that these events are not alone sufficient for lymphomagenesis<sup>42,67-71</sup>. We  
369 and others have observed a co-association between the mutation of these genes and *BCL2*  
370 translocations<sup>16,21</sup>, and the addition of a *Bcl2* transgene to these murine models indeed  
371 promoted lymphoma at a significantly higher rate than that observed with the *Bcl2* transgene  
372 alone<sup>42,67-71</sup>. These genetic alterations are therefore significantly more lymphomagenic in  
373 combination than they are alone, which provides proof of principle that an epistatic relationship  
374 exists between these co-occurring genetic alterations. Future studies focusing on other co-  
375 occurring mutations, such as *MYC* translocation and *SMARCA4* mutation in BL, *CREBBP* and  
376 *KMT2D* mutation in FL, *TCF4* copy gain and *MYD88* mutation in DLBCL, and *ATM* mutation and  
377 *RPL5* deletion in MCL, should therefore be performed to further explore these concepts and  
378 define their underlying functional relationship. We suggest that combinations of genetic  
379 alterations are likely to more accurately recapitulate the biology of B-NHL than single gene  
380 models, and may reveal contextually different functional roles of genetic alterations depending  
381 on the co-occurring events.

382

383 In conclusion, we have provided a framework of functional hallmarks and co-occurring genetic  
384 alterations that are enriched within B-NHL subtypes. These genetic alterations likely represent  
385 epistatic interactions that underpin the biology of these tumors, and represent an opportunity for  
386 better understanding lymphoma etiology so that we can identify novel rational approaches for  
387 therapeutic targeting of the underlying biology.

388

### 389 **ACKNOWLEDGEMENTS**

390 This research was supported by NCI R01CA201380 (MRG), the Nebraska Department of  
391 Health and Human Services (LB506 2016-17; MRG), the Jaime Erin Follicular Lymphoma  
392 Research Consortium (MRG and SSN), the Fitcher Foundation (LN and MRG), the Schweitzer  
393 Family Fund (JRW, RED, MRG), a Leukemia and Lymphoma Society Fellow Award (HY), and  
394 NCI cancer center support grants to the University of Texas MD Anderson Cancer Center (P30  
395 CA016672) and the Fred & Pamela Buffet Cancer Center (P30 CA036727).

396

### 397 **AUTHOR CONTRIBUTIONS**

398 MCJM and ST performed experiments, analyzed data and wrote the manuscript. AB analyzed  
399 data. AB, TBH, HY, QD, DM, KH, NJ, JS, and SG performed experiments. AA, LS, MD, CC, JT,  
400 DP, KMV, MAL, ARS, BJC, RB, SSN, LN, RED, JW, SP, MKG, DS, JI, TG, SR, and AM  
401 provided samples and/or clinical data. MRG conceived and supervised the study, performed  
402 experiments, analyzed the data and wrote the manuscript. All authors reviewed and approved  
403 the manuscript.

404



405 **DISCLOSURES OF CONFLICTS OF INTEREST**

406 The authors have no conflicts of interest related to this work.

407

408

409 **REFERENCES**

- 410 1 Swerdlow, S. H. *et al.* The 2016 revision of the World Health Organization classification  
411 of lymphoid neoplasms. *Blood* **127**, 2375-2390, doi:10.1182/blood-2016-01-643569  
412 (2016).
- 413 2 Armitage, J. O., Gascoyne, R. D., Lunning, M. A. & Cavalli, F. Non-Hodgkin lymphoma.  
414 *Lancet* **390**, 298-310, doi:10.1016/S0140-6736(16)32407-2 (2017).
- 415 3 Chapuy, B. *et al.* Molecular subtypes of diffuse large B cell lymphoma are associated  
416 with distinct pathogenic mechanisms and outcomes. *Nature medicine* **24**, 679-690,  
417 doi:10.1038/s41591-018-0016-8 (2018).
- 418 4 Schmitz, R. *et al.* Genetics and Pathogenesis of Diffuse Large B-Cell Lymphoma. *The*  
419 *New England journal of medicine* **378**, 1396-1407, doi:10.1056/NEJMoa1801445 (2018).
- 420 5 Reddy, A. *et al.* Genetic and Functional Drivers of Diffuse Large B Cell Lymphoma. *Cell*  
421 **171**, 481-494 e415, doi:10.1016/j.cell.2017.09.027 (2017).
- 422 6 Bea, S. *et al.* Landscape of somatic mutations and clonal evolution in mantle cell  
423 lymphoma. *Proceedings of the National Academy of Sciences of the United States of*  
424 *America* **110**, 18250-18255, doi:10.1073/pnas.1314608110 (2013).
- 425 7 Zhang, J. *et al.* The genomic landscape of mantle cell lymphoma is related to the  
426 epigenetically determined chromatin state of normal B cells. *Blood* **123**, 2988-2996,  
427 doi:10.1182/blood-2013-07-517177 (2014).
- 428 8 Wang, J. Q. *et al.* Synergistic cooperation and crosstalk between MYD88L265P and  
429 mutations that dysregulate CD79B and surface IgM. *The Journal of experimental*  
430 *medicine* **214**, 2759-2776, doi:10.1084/jem.20161454 (2017).
- 431 9 Lenz, G. *et al.* Stromal gene signatures in large-B-cell lymphomas. *The New England*  
432 *journal of medicine* **359**, 2313-2323, doi:10.1056/NEJMoa0802885 (2008).
- 433 10 Dave, S. S. *et al.* Molecular diagnosis of Burkitt's lymphoma. *The New England journal*  
434 *of medicine* **354**, 2431-2442, doi:10.1056/NEJMoa055759 (2006).
- 435 11 Iqbal, J. *et al.* Genome-wide miRNA profiling of mantle cell lymphoma reveals a distinct  
436 subgroup with poor prognosis. *Blood* **119**, 4939-4948, doi:10.1182/blood-2011-07-  
437 370122 (2012).
- 438 12 Bouska, A. *et al.* Adult High Grade B-cell Lymphoma with Burkitt Lymphoma Signature:  
439 Genomic features and Potential Therapeutic Targets. *Blood*, doi:10.1182/blood-2017-02-  
440 767335 (2017).
- 441 13 Khodadoust, M. S. *et al.* Antigen presentation profiling reveals recognition of lymphoma  
442 immunoglobulin neoantigens. *Nature* **543**, 723-727, doi:10.1038/nature21433 (2017).
- 443 14 Schmitz, R. *et al.* Burkitt lymphoma pathogenesis and therapeutic targets from structural  
444 and functional genomics. *Nature* **490**, 116-120, doi:10.1038/nature11378 (2012).
- 445 15 Love, C. *et al.* The genetic landscape of mutations in Burkitt lymphoma. *Nature genetics*  
446 **44**, 1321-1325, doi:10.1038/ng.2468 (2012).

- 447 16 Morin, R. D. *et al.* Frequent mutation of histone-modifying genes in non-Hodgkin  
448 lymphoma. *Nature* **476**, 298-303, doi:10.1038/nature10351 (2011).
- 449 17 Morin, R. D. *et al.* Mutational and structural analysis of diffuse large B-cell lymphoma  
450 using whole-genome sequencing. *Blood* **122**, 1256-1265, doi:10.1182/blood-2013-02-  
451 483727 (2013).
- 452 18 Pasqualucci, L. *et al.* Analysis of the coding genome of diffuse large B-cell lymphoma.  
453 *Nature genetics* **43**, 830-837, doi:10.1038/ng.892 (2011).
- 454 19 Lohr, J. G. *et al.* Discovery and prioritization of somatic mutations in diffuse large B-cell  
455 lymphoma (DLBCL) by whole-exome sequencing. *Proceedings of the National Academy*  
456 *of Sciences of the United States of America* **109**, 3879-3884,  
457 doi:10.1073/pnas.1121343109 (2012).
- 458 20 Green, M. R. *et al.* Hierarchy in somatic mutations arising during genomic evolution and  
459 progression of follicular lymphoma. *Blood* **121**, 1604-1611, doi:10.1182/blood-2012-09-  
460 457283 (2013).
- 461 21 Green, M. R. *et al.* Mutations in early follicular lymphoma progenitors are associated with  
462 suppressed antigen presentation. *Proceedings of the National Academy of Sciences of*  
463 *the United States of America* **112**, E1116-1125, doi:10.1073/pnas.1501199112 (2015).
- 464 22 Okosun, J. *et al.* Integrated genomic analysis identifies recurrent mutations and  
465 evolution patterns driving the initiation and progression of follicular lymphoma. *Nature*  
466 *genetics* **46**, 176-181, doi:10.1038/ng.2856 (2014).
- 467 23 Pasqualucci, L. *et al.* Genetics of follicular lymphoma transformation. *Cell reports* **6**, 130-  
468 140, doi:10.1016/j.celrep.2013.12.027 (2014).
- 469 24 Landau, D. A. *et al.* Evolution and impact of subclonal mutations in chronic lymphocytic  
470 leukemia. *Cell* **152**, 714-726, doi:10.1016/j.cell.2013.01.019 (2013).
- 471 25 Puente, X. S. *et al.* Whole-genome sequencing identifies recurrent mutations in chronic  
472 lymphocytic leukaemia. *Nature* **475**, 101-105, doi:10.1038/nature10113 (2011).
- 473 26 Wang, L. *et al.* SF3B1 and other novel cancer genes in chronic lymphocytic leukemia.  
474 *The New England journal of medicine* **365**, 2497-2506, doi:10.1056/NEJMoa1109016  
475 (2011).
- 476 27 Kiel, M. J. *et al.* Whole-genome sequencing identifies recurrent somatic NOTCH2  
477 mutations in splenic marginal zone lymphoma. *The Journal of experimental medicine*  
478 **209**, 1553-1565, doi:10.1084/jem.20120910 (2012).
- 479 28 Rossi, D. *et al.* The coding genome of splenic marginal zone lymphoma: activation of  
480 NOTCH2 and other pathways regulating marginal zone development. *The Journal of*  
481 *experimental medicine* **209**, 1537-1551, doi:10.1084/jem.20120904 (2012).
- 482 29 Chapman, M. A. *et al.* Initial genome sequencing and analysis of multiple myeloma.  
483 *Nature* **471**, 467-472, doi:10.1038/nature09837 (2011).
- 484 30 Treon, S. P. *et al.* MYD88 L265P somatic mutation in Waldenstrom's macroglobulinemia.  
485 *The New England journal of medicine* **367**, 826-833, doi:10.1056/NEJMoa1200710  
486 (2012).
- 487 31 Gunawardana, J. *et al.* Recurrent somatic mutations of PTPN1 in primary mediastinal B  
488 cell lymphoma and Hodgkin lymphoma. *Nature genetics* **46**, 329-335,  
489 doi:10.1038/ng.2900 (2014).
- 490 32 Vater, I. *et al.* The mutational pattern of primary lymphoma of the central nervous system  
491 determined by whole-exome sequencing. *Leukemia* **29**, 677-685,  
492 doi:10.1038/leu.2014.264 (2015).
- 493 33 Kuilman, T. *et al.* Copywriter: DNA copy number detection from off-target sequence  
494 data. *Genome biology* **16**, 49, doi:10.1186/s13059-015-0617-1 (2015).
- 495 34 Newman, A. M. *et al.* FACTERA: a practical method for the discovery of genomic  
496 rearrangements at breakpoint resolution. *Bioinformatics* **30**, 3390-3393,  
497 doi:10.1093/bioinformatics/btu549 (2014).

- 498 35 Lek, M. *et al.* Analysis of protein-coding genetic variation in 60,706 humans. *Nature* **536**,  
499 285-291, doi:10.1038/nature19057 (2016).
- 500 36 Lawrence, M. S. *et al.* Mutational heterogeneity in cancer and the search for new  
501 cancer-associated genes. *Nature* **499**, 214-218, doi:10.1038/nature12213 (2013).
- 502 37 Mermel, C. H. *et al.* GISTIC2.0 facilitates sensitive and confident localization of the  
503 targets of focal somatic copy-number alteration in human cancers. *Genome biology* **12**,  
504 R41, doi:10.1186/gb-2011-12-4-r41 (2011).
- 505 38 Carter, S. L. *et al.* Absolute quantification of somatic DNA alterations in human cancer.  
506 *Nature biotechnology* **30**, 413-421, doi:10.1038/nbt.2203 (2012).
- 507 39 Alexandrov, L. B. *et al.* Signatures of mutational processes in human cancer. *Nature*  
508 **500**, 415-421, doi:10.1038/nature12477 (2013).
- 509 40 Huang, D. W. *et al.* DAVID Bioinformatics Resources: expanded annotation database  
510 and novel algorithms to better extract biology from large gene lists. *Nucleic acids*  
511 *research* **35**, W169-175, doi:10.1093/nar/gkm415 (2007).
- 512 41 Saeki, K., Miura, Y., Aki, D., Kurosaki, T. & Yoshimura, A. The B cell-specific major raft  
513 protein, Raftlin, is necessary for the integrity of lipid raft and BCR signal transduction.  
514 *EMBO J* **22**, 3015-3026, doi:10.1093/emboj/cdg293 (2003).
- 515 42 Jiang, Y. *et al.* CREBBP Inactivation Promotes the Development of HDAC3-Dependent  
516 Lymphomas. *Cancer discovery* **7**, 38-53, doi:10.1158/2159-8290.CD-16-0975 (2017).
- 517 43 Beguelin, W. *et al.* EZH2 and BCL6 Cooperate to Assemble CBX8-BCOR Complex to  
518 Repress Bivalent Promoters, Mediate Germinal Center Formation and  
519 Lymphomagenesis. *Cancer cell* **30**, 197-213, doi:10.1016/j.ccell.2016.07.006 (2016).
- 520 44 Pawar, S. A. *et al.* C/EBP $\delta$  targets cyclin D1 for proteasome-mediated degradation  
521 via induction of CDC27/APC3 expression. *Proceedings of the National Academy of*  
522 *Sciences of the United States of America* **107**, 9210-9215,  
523 doi:10.1073/pnas.0913813107 (2010).
- 524 45 Akasaka, T., Lossos, I. S. & Levy, R. BCL6 gene translocation in follicular lymphoma: a  
525 harbinger of eventual transformation to diffuse aggressive lymphoma. *Blood* **102**, 1443-  
526 1448, doi:10.1182/blood-2002-08-2482 (2003).
- 527 46 Kato, M. *et al.* Frequent inactivation of A20 in B-cell lymphomas. *Nature* **459**, 712-716,  
528 doi:10.1038/nature07969 (2009).
- 529 47 Greiner, T. C. *et al.* Mutation and genomic deletion status of ataxia telangiectasia  
530 mutated (ATM) and p53 confer specific gene expression profiles in mantle cell  
531 lymphoma. *Proceedings of the National Academy of Sciences of the United States of*  
532 *America* **103**, 2352-2357, doi:10.1073/pnas.0510441103 (2006).
- 533 48 Challa-Malladi, M. *et al.* Combined genetic inactivation of beta2-Microglobulin and CD58  
534 reveals frequent escape from immune recognition in diffuse large B cell lymphoma.  
535 *Cancer cell* **20**, 728-740, doi:10.1016/j.ccr.2011.11.006 (2011).
- 536 49 Pfeifer, M. *et al.* PTEN loss defines a PI3K/AKT pathway-dependent germinal center  
537 subtype of diffuse large B-cell lymphoma. *Proceedings of the National Academy of*  
538 *Sciences of the United States of America* **110**, 12420-12425,  
539 doi:10.1073/pnas.1305656110 (2013).
- 540 50 Jain N, H. K., Tadros S, Fiskus W, Havranek O, Ma M, Bouska A, Heavican T, Kumar D,  
541 Deng Q, Moore D, Pak C, Liu C, Gentles A, Hartmann E, Kridel R, Ekstrom-Smedby K,  
542 Juliusson G, Rosenquist R, Gascoyne R, Rosenwald A, Giancotti F, Neelapu S, Westin  
543 J, Vose J, Lunning M, Greiner T, Rodig S, Iqbal J, Alizadeh A, Davis RE, Bhalla K,  
544 Green M. Targetable genetic alterations of TCF4 (E2-2) drive immunoglobulin  
545 expression in the activated B-cell subtype of diffuse large B-cell lymphoma. *Sci. Transl.*  
546 *Med.* **In Press** (2019).

- 547 51 Ingley, E. *et al.* Csk-binding protein mediates sequential enzymatic down-regulation and  
548 degradation of Lyn in erythropoietin-stimulated cells. *The Journal of biological chemistry*  
549 **281**, 31920-31929, doi:10.1074/jbc.M602637200 (2006).
- 550 52 Hu, S., Alcivar, A., Qu, L., Tang, J. & Yang, X. CIAP2 inhibits anigen receptor signaling  
551 by targeting Bcl10 for degradation. *Cell cycle* **5**, 1438-1442, doi:10.4161/cc.5.13.2866  
552 (2006).
- 553 53 Compagno, M. *et al.* Mutations of multiple genes cause deregulation of NF-kappaB in  
554 diffuse large B-cell lymphoma. *Nature* **459**, 717-721, doi:10.1038/nature07968 (2009).
- 555 54 Liu, W. H. & Lai, M. Z. Deltex regulates T-cell activation by targeted degradation of  
556 active MEKK1. *Molecular and cellular biology* **25**, 1367-1378,  
557 doi:10.1128/MCB.25.4.1367-1378.2005 (2005).
- 558 55 Liu, W. *et al.* Direct inhibition of Bruton's tyrosine kinase by IBtk, a Btk-binding protein.  
559 *Nature immunology* **2**, 939-946, doi:10.1038/ni1001-939 (2001).
- 560 56 Joo, H. M. *et al.* Ret finger protein 2 enhances ionizing radiation-induced apoptosis via  
561 degradation of AKT and MDM2. *Eur J Cell Biol* **90**, 420-431,  
562 doi:10.1016/j.ejcb.2010.12.001 (2011).
- 563 57 Davis, R. E. *et al.* Chronic active B-cell-receptor signalling in diffuse large B-cell  
564 lymphoma. *Nature* **463**, 88-92, doi:10.1038/nature08638 (2010).
- 565 58 Ngo, V. N. *et al.* Oncogenically active MYD88 mutations in human lymphoma. *Nature*  
566 **470**, 115-119, doi:10.1038/nature09671 (2011).
- 567 59 Krysiak, K. *et al.* Recurrent somatic mutations affecting B-cell receptor signaling pathway  
568 genes in follicular lymphoma. *Blood* **129**, 473-483, doi:10.1182/blood-2016-07-729954  
569 (2017).
- 570 60 Gloury, R. *et al.* Dynamic changes in Id3 and E-protein activity orchestrate germinal  
571 center and plasma cell development. *The Journal of experimental medicine* **213**, 1095-  
572 1111, doi:10.1084/jem.20152003 (2016).
- 573 61 Okosun, J. *et al.* Recurrent mTORC1-activating RRAGC mutations in follicular  
574 lymphoma. *Nature genetics* **48**, 183-188, doi:10.1038/ng.3473 (2016).
- 575 62 Wang, F. *et al.* Follicular lymphoma-associated mutations in vacuolar ATPase  
576 ATP6V1B2 activate autophagic flux and mTOR. *The Journal of clinical investigation* **130**,  
577 1626-1640, doi:10.1172/JCI98288 (2019).
- 578 63 Hu, J. *et al.* MiR-361-3p regulates ERK1/2-induced EMT via DUSP2 mRNA degradation  
579 in pancreatic ductal adenocarcinoma. *Cell Death Dis* **9**, 807, doi:10.1038/s41419-018-  
580 0839-8 (2018).
- 581 64 Lu, D. *et al.* The phosphatase DUSP2 controls the activity of the transcription activator  
582 STAT3 and regulates TH17 differentiation. *Nature immunology* **16**, 1263-1273,  
583 doi:10.1038/ni.3278 (2015).
- 584 65 Green, M. R. Chromatin modifying gene mutations in follicular lymphoma. *Blood* **131**,  
585 595-604, doi:10.1182/blood-2017-08-737361 (2018).
- 586 66 Ashworth, A., Lord, C. J. & Reis-Filho, J. S. Genetic interactions in cancer progression  
587 and treatment. *Cell* **145**, 30-38, doi:10.1016/j.cell.2011.03.020 (2011).
- 588 67 Beguelin, W. *et al.* EZH2 is required for germinal center formation and somatic EZH2  
589 mutations promote lymphoid transformation. *Cancer cell* **23**, 677-692,  
590 doi:10.1016/j.ccr.2013.04.011 (2013).
- 591 68 Garcia-Ramirez, I. *et al.* Crebbp loss cooperates with Bcl2 over-expression to promote  
592 lymphoma in mice. *Blood* **129**, 2645-2656, doi:10.1182/blood-2016-08-733469 (2017).
- 593 69 Zhang, J. *et al.* The Crebbp Acetyltransferase is a Haploinsufficient Tumor Suppressor in  
594 B Cell Lymphoma. *Cancer discovery*, doi:10.1158/2159-8290.CD-16-1417 (2017).
- 595 70 Zhang, J. *et al.* Disruption of KMT2D perturbs germinal center B cell development and  
596 promotes lymphomagenesis. *Nature medicine* **21**, 1190-1198, doi:10.1038/nm.3940  
597 (2015).

598 71 Ortega-Molina, A. *et al.* The histone lysine methyltransferase KMT2D sustains a gene  
599 expression program that represses B cell lymphoma development. *Nature medicine* **21**,  
600 1199-1208, doi:10.1038/nm.3943 (2015).

601

602

603

604

## 605 **FIGURE LEGENDS**

606 **Figure 1: Recurrently mutated genes in B-NHL subtypes.** An oncoplot shows significantly  
607 mutated genes across our cohort of 755 B-NHL tumors, arranged according to functional  
608 category and frequency. The mutational burden and distribution of mutation types for each case  
609 are shown at the top. Amino acid residues for mutational hotspots and/or domains targeted by  
610 clustered mutations are shown on the right.

611

612 **Figure 2: Structural alterations in B-NHL subtypes. A)** A circos plot shows translocations of  
613 the MYC (purple), BCL2 (orange) and BCL6 (green) genes, and GISTIC tracks of DNA copy  
614 number gains (red) and losses (blue). **B-C)** Volcano plots of integrative analysis results showing  
615 the changes in gene expression of genes within peaks of DNA copy number gain (B) or loss (C).  
616 The shaded region in B marks genes with significantly increased expression in tumors with  
617 increased copy number compared to those without; the converse is true for the shaded region in  
618 C. **D)** An oncoplot with DNA copy number losses and gains ranked according to their frequency  
619 shows the distribution of structural alterations across tumors. E) Oncoplots show the overlap of  
620 structural alterations and mutations that target the same genes. P-values are derived from a  
621 Fisher's exact test (ns, not significant).

622

623

624

625

626

627 **Figure 3: Genetic alterations of the ubiquitin proteasome system (UPS) and potential**  
628 **interplay with BCR signaling. A)** A graphical illustration of UPS gene genetic alterations  
629 (mutations, teal; deletions, blue; copy gain, red) and literature supported targets of the UPS  
630 genes. The function of UPS gene targets is categorized according to the hallmarks shown in  
631 figure 1. **B)** A schematic of the different layers of genetic alterations (mutations, teal; deletions,  
632 blue; copy gain, red) affecting signaling pathways in B-NHL. UPS genes are highlighted with a  
633 yellow halo.

634

635 **Figure 4: Subtype-specific clusters of co-occurring genetic alterations.** The frequency (bar  
636 graph) and over/under-representation (blue to yellow scale) of mutations and structural  
637 alterations is shown on the left for BL, DLBCL, FL and MCL. Over/under-representation in  
638 molecular Burkitt and cell of origin molecular subtypes is shown for each alteration at the  
639 bottom. The correlation matrix of co-associated (green) and mutually-exclusive (purple)  
640 relationships was clustered and identified groups of co-occurring genetic alterations that were  
641 predominantly over-represented in a single B-NHL subtype.

642

643

644

645

646

647

648

649 **Figure 5: Subtype-specific patterns of SWI/SNF complex mutations. A)** An oncoplot shows  
650 the frequency of genetic alterations in genes that encode components of the SWI/SNF complex.  
651 **B)** A schematic of the SWI/SNF complex shows recurrently mutated genes, *ARID1A*,  
652 *SMARCA4* and *BCL7A*, and the *BCL11A* gene that is targeted by 2p15 DNA copy number  
653 gains. **C-E)** Lollipop plots show the distribution of mutations in the SWI/SNF components  
654 *ARID1A* (C), *SMARCA4* (D), and *BCL7A* (E). **F)** A heatplot shows the location of chromosome  
655 2p DNA copy number gains (red) in all tumors (rows) with 2p15 copy gain (n=92, copy number >  
656 2.2) ordered from highest DNA copy number (top) to lowest (bottom). The *BCL11A* gene is in  
657 the peak focal copy gain.

658

659 **Figure 6: Cumulative burden of clonal co-occurring mutations. A)** A bar plot shows the  
660 frequency of tumors with genetic alterations from each subtype-defining cluster, grouped by the  
661 number of co-occurring alterations observed per tumor. The frequency of tumors with 3 or more  
662 genetic alterations per tumor is significantly higher in the subtype for which each cluster is  
663 named (\*\*\*Fisher P-value < 0.001). **B-D)** An oncoplot, colored by cancer cell fraction (CCF) from  
664 ABSOLUTE, shows the representation and clonality of BL cluster (B), FL cluster (C) and MCL  
665 cluster (D) mutations across the dataset. The rate of co-occurrence of multiple genetic  
666 alterations in a single tumor (columns) is observably higher in the subtypes for which the

667 clusters are named, and the co-occurring genetics are most often clonal ( $CCF > 0.9$ ). BL, Burkitt  
668 Lymphoma. HG, other high-grade lymphoma (DHL/THL, HGBL-NOS). DLBCL, diffuse large B-  
669 cell lymphoma. FL, follicular lymphoma. MCL, mantle cell lymphoma. LG, other low-grade  
670 lymphoma (CLL/SLL, MZL).



# Figure 1

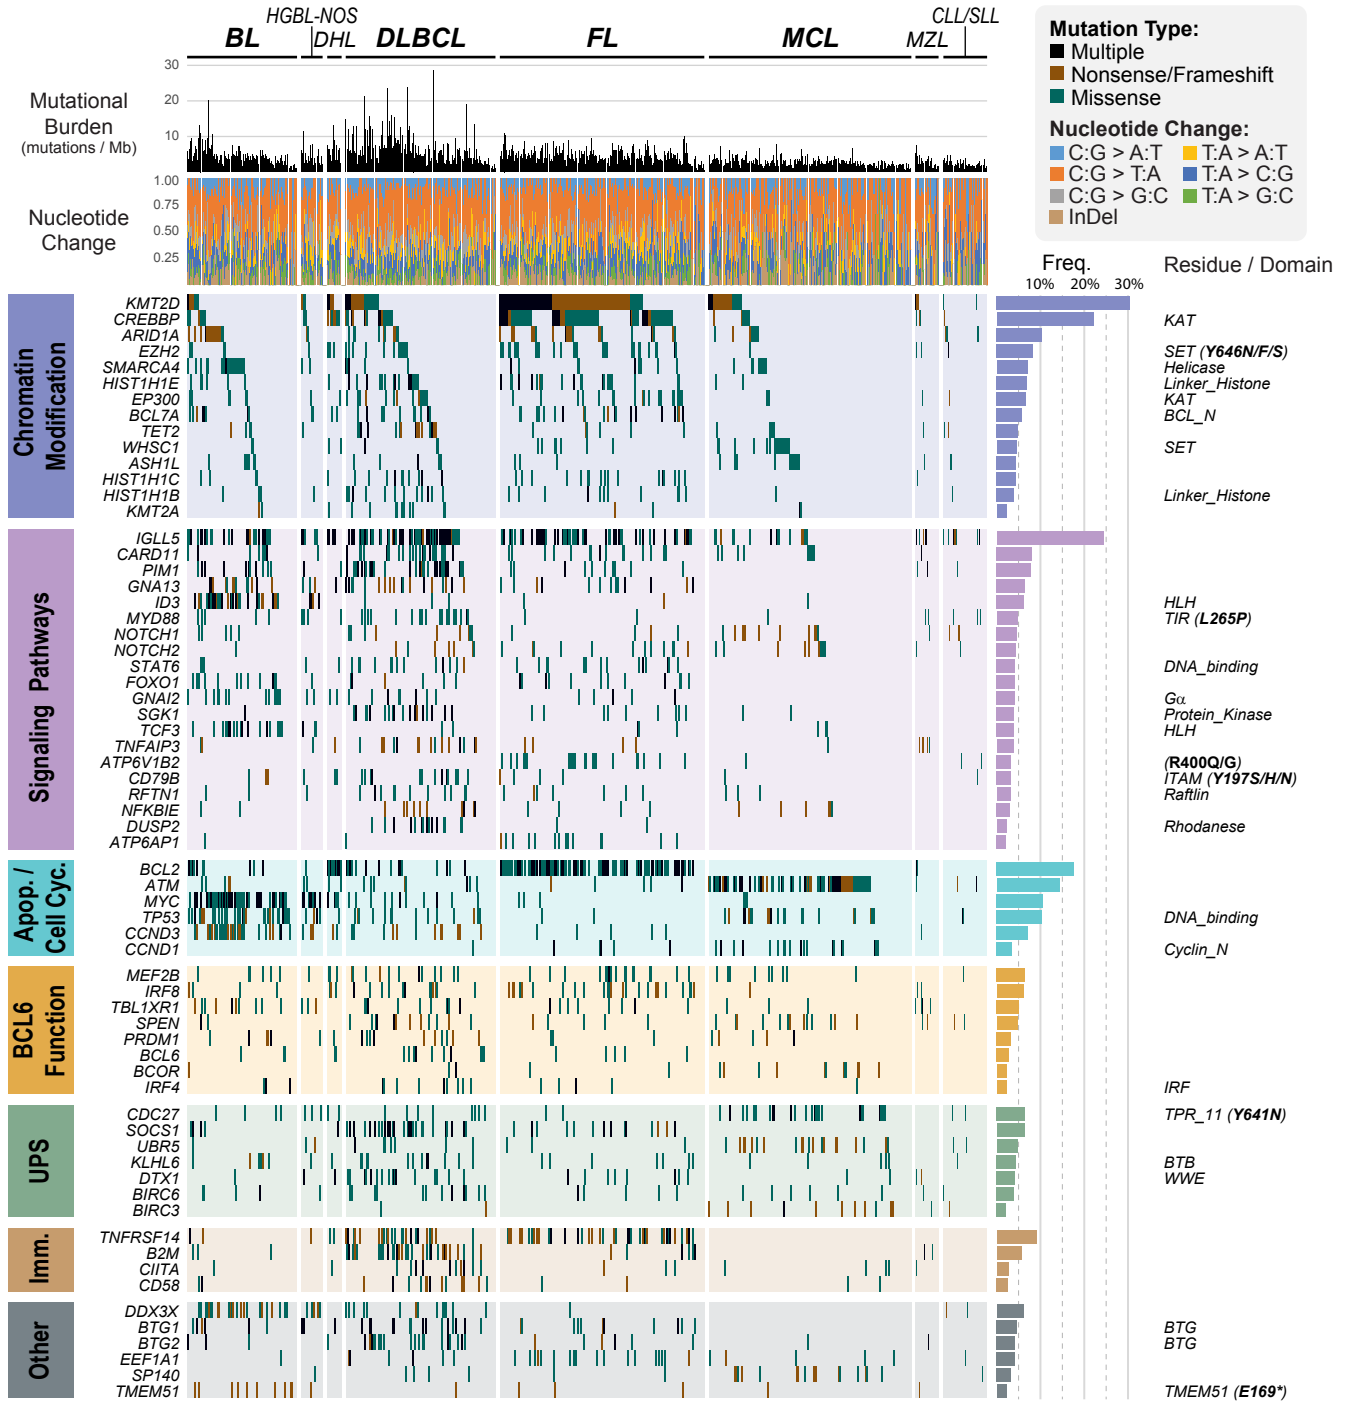

# Figure 2

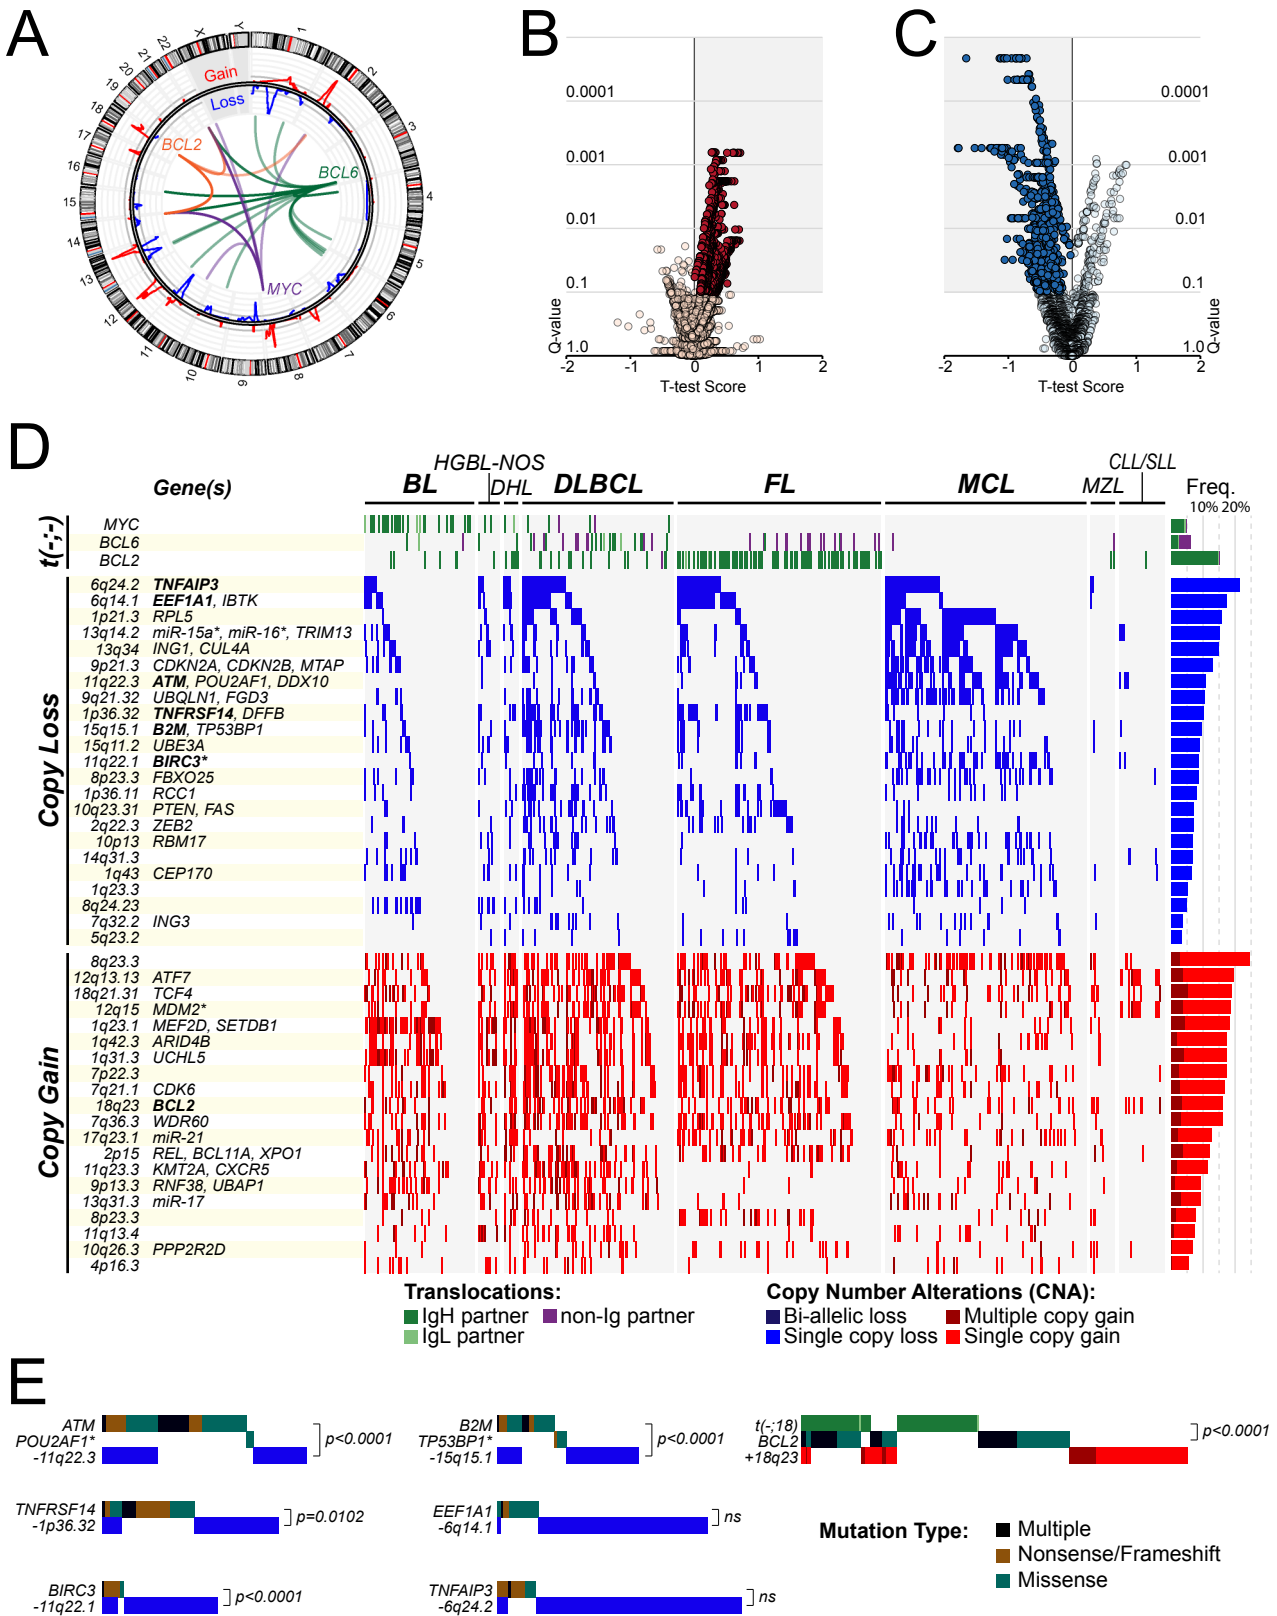

# Figure 3

bioRxiv preprint doi: <https://doi.org/10.1101/674259>; this version posted June 19, 2019. The copyright holder for this preprint (which was not certified by peer review) is the author/funder, who has granted bioRxiv a license to display the preprint in perpetuity. It is made available under aCC-BY-NC-ND 4.0 International license.

A

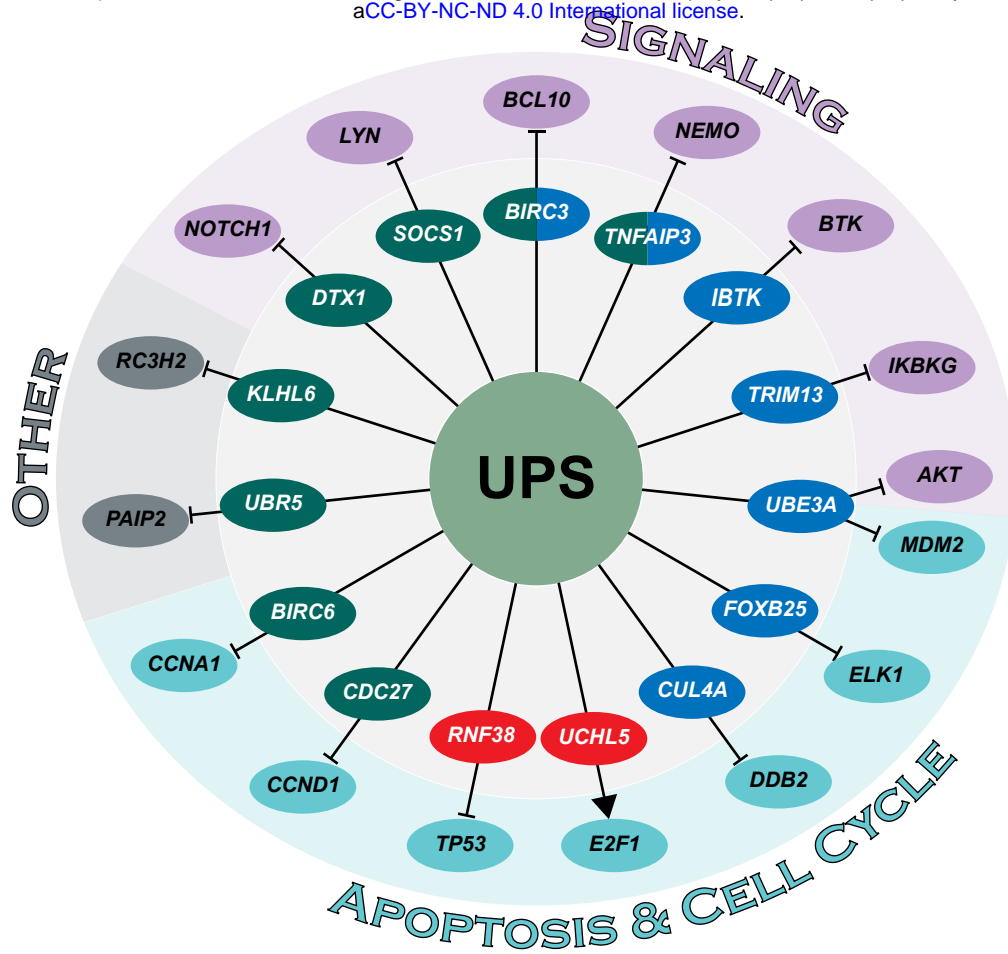

B

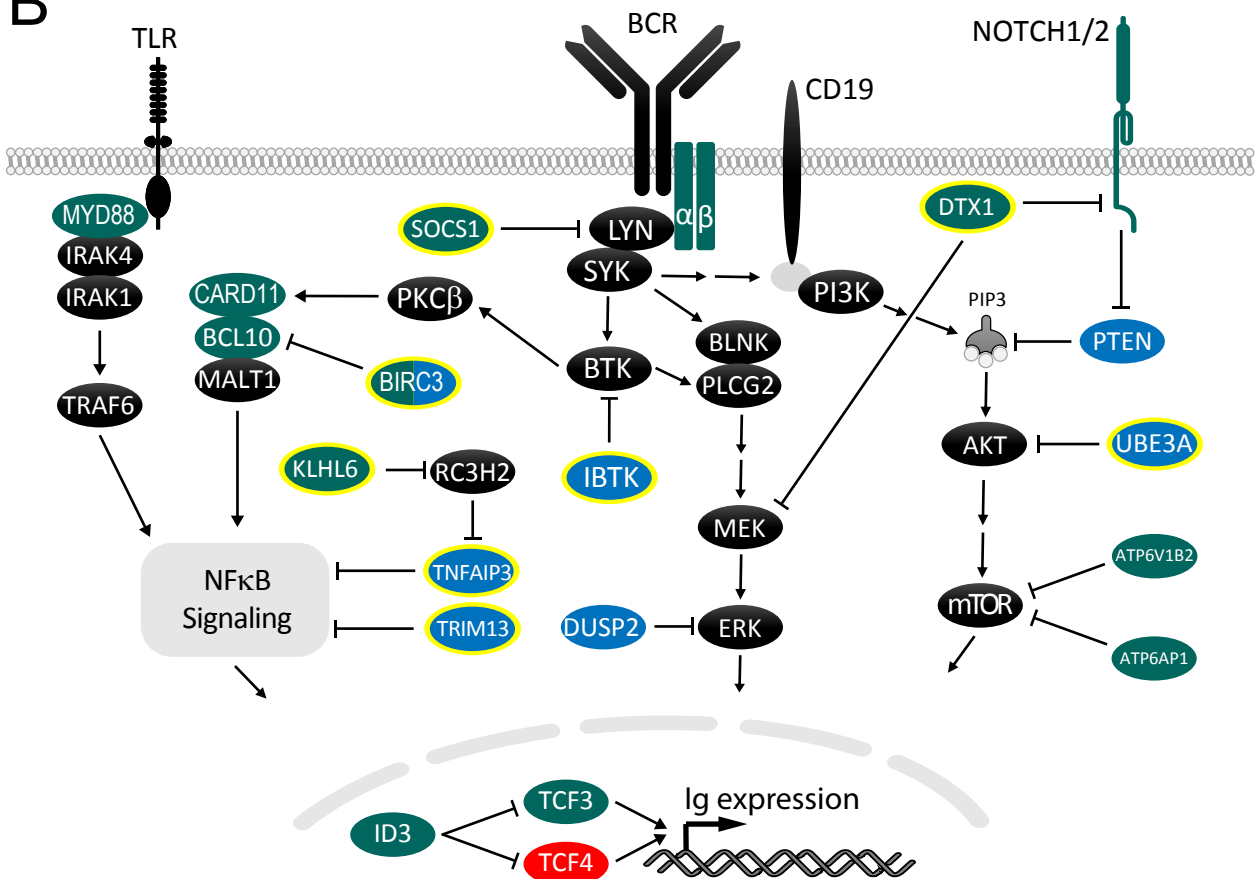



# Figure 5

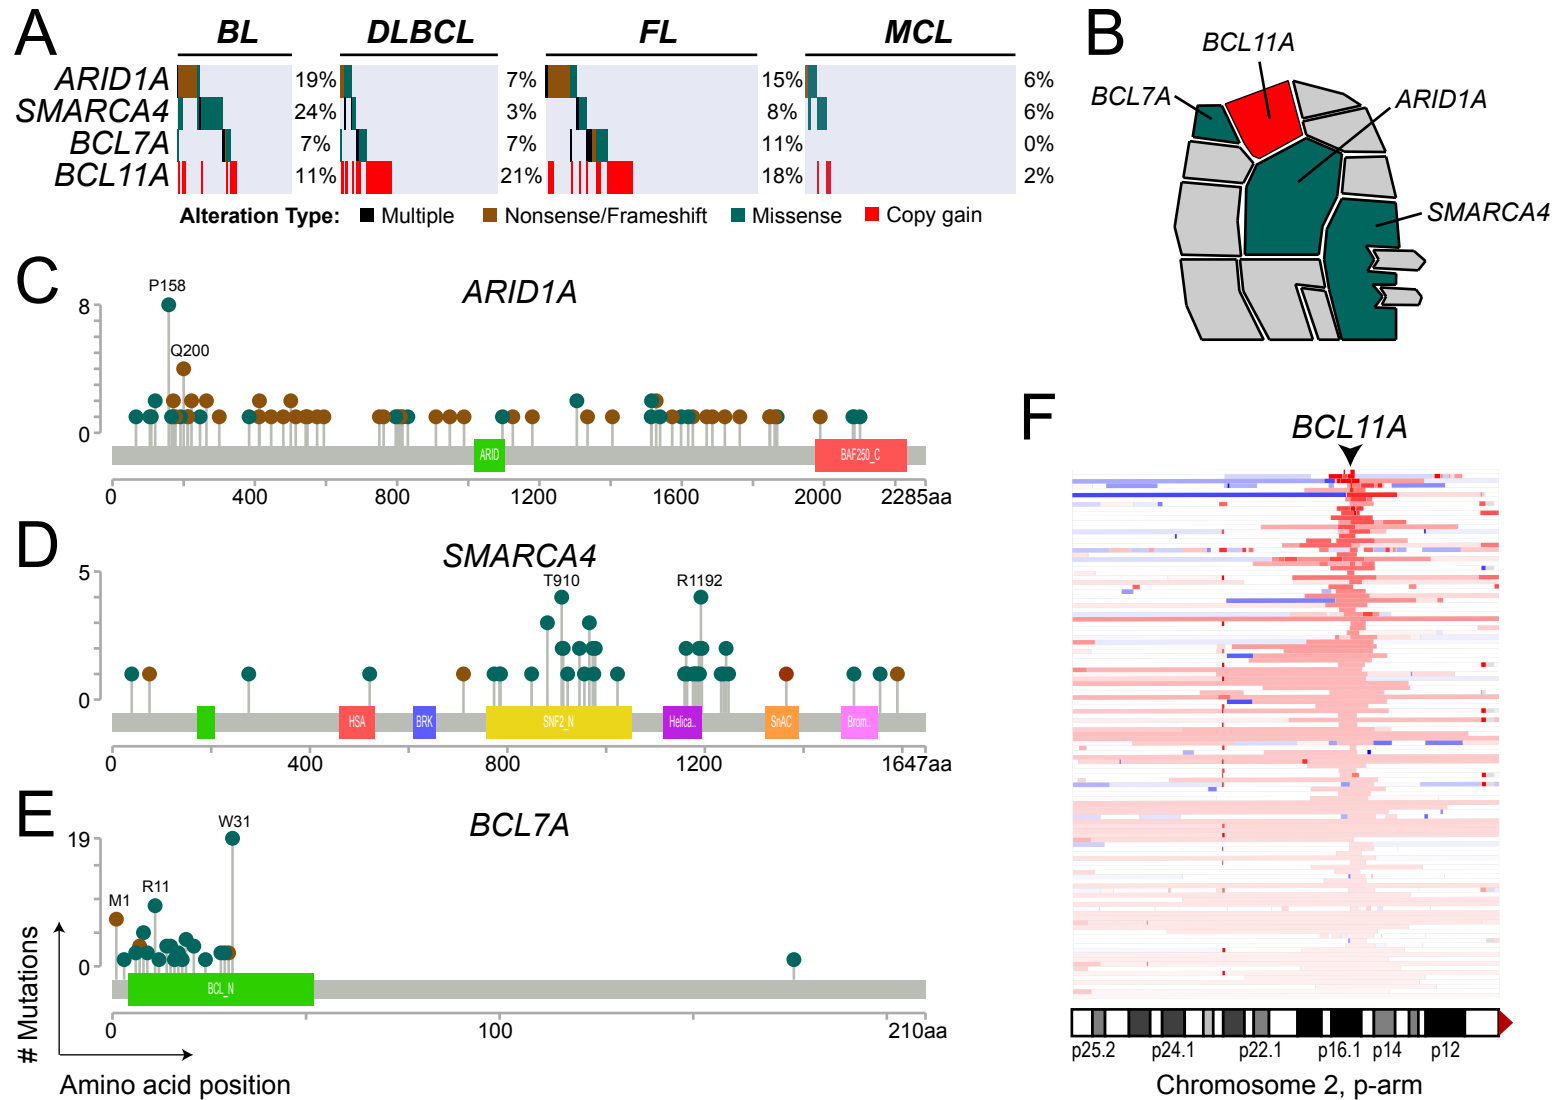

# Figure 6

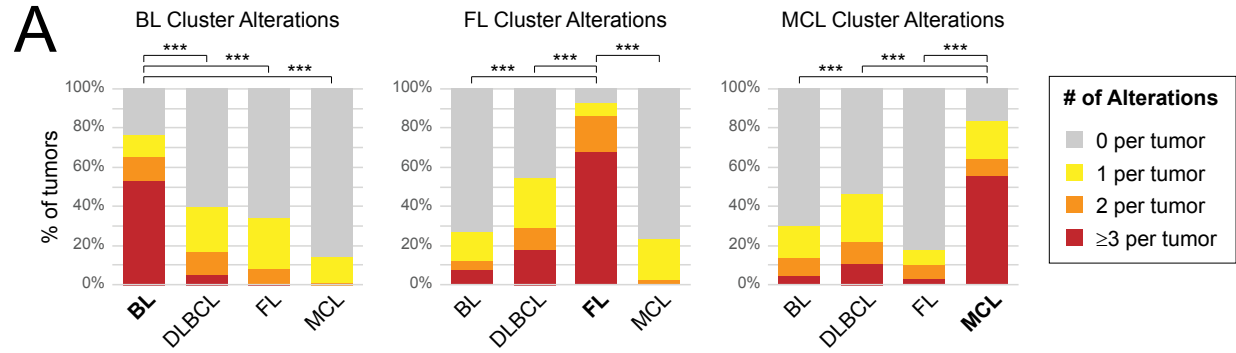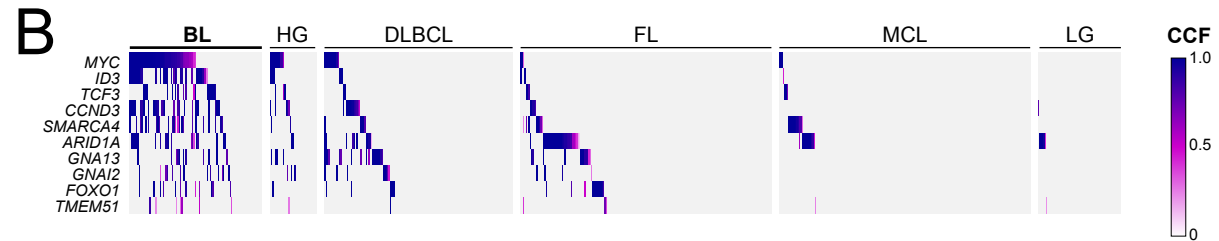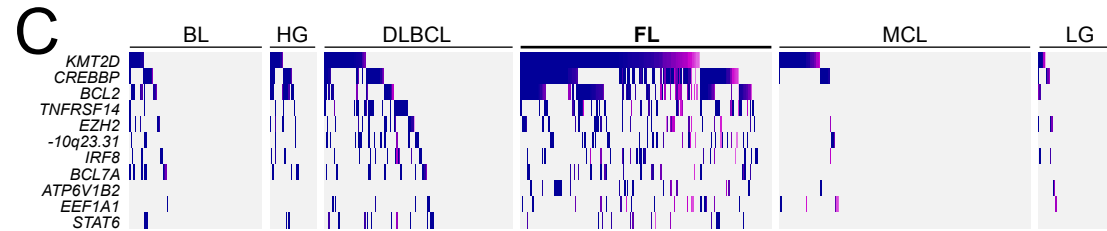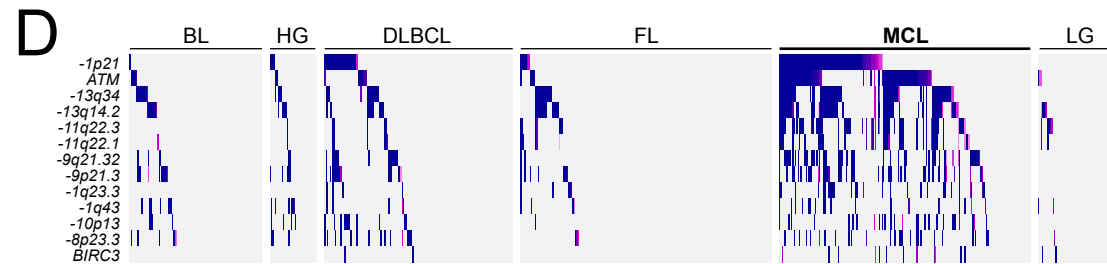

Source: https://biorxiv.org/content/biorxiv/early/2019/06/19/674259.full-text.pdf
