# Subtype-specific and co-occurring genetic alterations in B-cell non-Hodgkin lymphoma

Running title: Patterns of genetic alterations in B-NHL

Man Chun John Ma<sup>1\*</sup>, Saber Tadros<sup>1\*</sup>, Alyssa Bouska<sup>2</sup>, Tayla Heavican<sup>2</sup>, Haopeng Yang<sup>1</sup>, Qing Deng<sup>1</sup>, Dalia Moore<sup>3</sup>, Ariz Akhter<sup>4</sup>, Keenan Hartert<sup>3</sup>, Neeraj Jain<sup>1</sup>, Jordan Showell<sup>1</sup>, Sreejoyee Ghosh<sup>1</sup>, Lesley Street<sup>5</sup>, Marta Davidson<sup>5</sup>, Christopher Carey<sup>6</sup>, Joshua Tobin<sup>7</sup>, Deepak Perumal<sup>8</sup>, Julie M. Vose<sup>9</sup>, Matthew A. Lunning<sup>9</sup>, Aliyah R. Sohani<sup>10</sup>, Benjamin J. Chen<sup>11</sup>, Shannon Buckley<sup>12</sup>, Loretta J. Nastoupil<sup>1</sup>, R. Eric Davis<sup>1</sup>, Jason R. Westin<sup>1</sup>, Nathan H. Fowler<sup>1</sup>, Samir Parekh<sup>8</sup>, Maher Gandhi<sup>7</sup>, Sattva Neelapu<sup>1</sup>, Douglas Stewart<sup>5</sup>, Kapil Bhalla<sup>13</sup>, Javeed Iqbal<sup>2</sup>, Timothy Greiner<sup>2</sup>, Scott J. Rodig<sup>14</sup>, Adnan Mansoor<sup>5</sup>, Michael R. Green<sup>1,14,15\*</sup>

<sup>1</sup>Department of Lymphoma and Myeloma, Division of Cancer Medicine, The University of Texas MD Anderson Cancer Center, Houston, TX, USA; <sup>2</sup>Department of Pathology and Microbiology, University of Nebraska Medical Center, Omaha, NE, USA; <sup>3</sup>Eppley Institute for Research in Cancer and Allied Diseases, University of Nebraska Medical Center, Omaha, NE, USA; <sup>4</sup>Department of Pathology and Laboratory Medicine, University of Calgary, Calgary, AB, Canada; <sup>5</sup>Section of Hematology, Department of Medicine, University of Calgary, Calgary, AB, Canada; <sup>6</sup>Northern Institute for Research, Newcastle University, Newcastle upon Tyne, England; <sup>7</sup>Diamantina Institute, University of Queensland, QLD, Australia; <sup>8</sup>Division of Hematology and Medical Oncology, Icahn School of Medicine at Mount Sinai, New York, NY, USA; <sup>9</sup>Department of Internal Medicine, Division of Hematology-Oncology, University of Nebraska Medical Center, Omaha, NE, USA; <sup>10</sup>Department of Pathology, Massachusetts General Hospital and Harvard Medical School, Boston, MA, USA; <sup>11</sup>Department of Pathology, University of Massachusetts Medical School, UMass Memorial Medical Center, Worcester, MA, USA; <sup>12</sup>Department of Genetics, Cell Biology and Anatomy, University of Nebraska Medical Center, Omaha, NE, USA; <sup>13</sup>Department of Pathology, Brigham and Womens Hospital, Boston, MA, USA; <sup>14</sup>Department of Genomic Medicine, University of Texas MD Anderson Cancer Center, Houston, TX, USA; <sup>15</sup>Center for Cancer Epigenetics, University of Texas MD Anderson Cancer Center, Houston, TX, USA.

\*Equally contributed

\*Corresponding Author

Michael R. Green, Ph.D.

Departments of Lymphoma & Myeloma and Genomic Medicine,

University of Texas MD Anderson Cancer Center,

1515 Holcombe Blvd, Unit 903,

Houston, TX 77030, USA

Phone: +1-713-745-4244

Email: [mgreen5@mdanderson.org](mailto:mgreen5@mdanderson.org)

40 **ABSTRACT**

41 B-cell non-Hodgkin's lymphoma (B-NHL) encompasses multiple clinically and phenotypically  
42 distinct subtypes of malignancy with unique molecular etiologies. Common subtypes of B-NHL  
43 such as diffuse large B-cell lymphoma (DLBCL) have been comprehensively interrogated at the  
44 genomic level. But rarer subtypes such as mantle cell lymphoma (MCL) remain sparsely  
45 characterized. Furthermore, multiple B-NHL subtypes have thus far not been comprehensively  
46 compared using the same methodology to identify conserved or subtype-specific patterns of  
47 genomic alterations. Here, we employed a large targeted hybrid-capture sequencing approach  
48 encompassing 380 genes to interrogate the genomic landscapes of 685 B-NHL tumors at high  
49 depth; including DLBCL, MCL, follicular lymphoma (FL), and Burkitt lymphoma (BL). We  
50 identified conserved hallmarks of B-NHL that were deregulated in the majority of tumor from  
51 each subtype, including the frequent genetic deregulation of the ubiquitin proteasome system  
52 (UPS). In addition, we identified subtype-specific patterns of genetic alterations, including  
53 clusters of co-occurring mutations and DNA copy number alterations. The cumulative burden of  
54 mutations within a single cluster were more discriminatory of B-NHL subtypes than individual  
55 mutations, implicating likely patterns of genetic cooperation that contribute to disease etiology.  
56 We therefore provide the first cross-sectional analysis of mutations and DNA copy number  
57 alterations across major B-NHL subtypes and a framework of co-occurring genetic alterations  
58 that deregulate genetic hallmarks and likely cooperate in lymphomagenesis.

59

60

61

62

63

## 64 INTRODUCTION

65 Non-Hodgkin's lymphomas (NHL) are a heterogeneous group of lymphoid malignancies that  
66 predominantly arise from mature B-cells (B-NHL). Although mature B-cell neoplasms  
67 encompass 38 unique diagnostic subtypes, over 85% of cases fall within only 7 histologies(1,  
68 2). Recent next generation sequencing (NGS) studies have shed light onto the key driver  
69 mutations in many of these B-NHL subtypes; for example, large studies of diffuse large B-cell  
70 lymphoma (DLBCL) have led to proposed genomic subtypes that have unique etiologies(3-5).  
71 However, many less common NHL subtypes such as mantle cell lymphoma (MCL) have not  
72 been as extensively characterized(6, 7). Furthermore, until recently(3, 4) genetic alterations  
73 have been considered in a binary fashion as either driver events, which directly promote  
74 disease genesis or progression, or passenger events, which have little/no impact on disease  
75 biology. In contrast to this principal, most B-NHLs do not result from a single dominant driver but  
76 instead result from the serial acquisition of genetic alterations that cooperate in  
77 lymphomagenesis(8). The genetic context of each mutation likely determines its oncogenic  
78 potential, and groups of mutations should therefore be considered collectively rather than on as  
79 singular events. For example, the 'C5' and 'MCD' clusters identified in DLBCL by Chapuy *et al.*  
80 and Schmitz *et al.*, respectively, are characterized by the co-occurrence of *CD79B* and *MYD88*  
81 mutations(3, 4). In animal models, the *Myd88* L252P mutation (equivalent to human L265P) was  
82 found to promote down-regulation of surface IgM and a phenotype resembling B-cell anergy(9).  
83 However, this effect could be rescued by *Cd79b* mutation, showing that these co-occurring  
84 mutations cooperate(9). The characterization of other significantly co-occurring genetic  
85 alterations are therefore likely to reveal additional important cooperative relationships. We  
86 approached this challenge by performing genomic profiling of 685 B-NHLs across different  
87 subtypes. Through this cross-sectional analysis we characterized genomic hallmarks of B-NHL  
88 and sets of significantly co-associated events that likely represent subtype-specific cooperating

89 genetic alterations. This study therefore provides new insight into how co-occurring clusters of  
90 genetic alterations may contribute to molecularly and phenotypically distinct subtypes of B-NHL.

91

## 92 **METHODS**

93 An overview of our approach is shown in Figure S1. For detailed methods, please refer to  
94 supplementary information.

95

### 96 Tumor DNA samples

97 We collected DNA from 685 B-NHL tumors, including 199 follicular lymphoma (FL), 196 mantle  
98 cell lymphoma (MCL), 148 diffuse large B-cell lymphoma (DLBCL), 107 Burkitt's lymphoma  
99 (BL), 21 high-grade B-cell lymphoma not otherwise specified (HGBL-NOS), and 14 high-grade  
100 B-cell lymphoma with *MYC*, *BCL2* and/or *BCL6* rearrangement (DHL) (Table S1). A total of 462  
101 samples were obtained from the University of Nebraska Medical Center, and were prioritized for  
102 inclusion in this study if they had been previously undergone pathology review and been  
103 interrogated by Affymetrix U133 Plus 2.0 gene expression microarrays(10-12) (n=284). An  
104 additional series of 223 FFPE tumors were collected from other centers. Samples were de-  
105 identified and accompanied by the diagnosis from the medical records, plus overall survival time  
106 and status when available. Medical record diagnosis was used in all cases except for those with  
107 fluorescence *in situ* hybridization showing translocations in *MYC* and *BCL2* and/or *BCL6*, which  
108 were amended to DHL. Sequencing results for a subset of 52 BL tumors were described  
109 previously(13). All MCL samples were either positive for *CCND1* translocation by FISH or  
110 positive for *CCND1* protein expression by immunohistochemistry, depending on the diagnostic  
111 practices of the contributing institution.

112

113 Next generation sequencing

114 A total of 500-1000ng of gDNA was sonicated using a Covaris S2 Ultrasonicator, and libraries  
115 prepared using KAPA Hyper Prep Kits (Roche) with TruSeq Adapters (Bioo Scientific) and a  
116 maximum of 8 cycles of PCR (average of 4 cycles). Libraries were qualified by TapeStation  
117 4200, quantified by Qubit and 10- to 12-plexed for hybrid capture. Each multiplexed library was  
118 enriched using our custom LymphoSeq panel encompassing the full coding sequences of 380  
119 genes that were determined to be somatically mutated in B-cell lymphoma (Table S2,  
120 Supplementary Methods), as well as tiling recurrent translocation breakpoints. Enrichments  
121 were amplified with 4-8 cycles of PCR and sequenced on a single lane of an Illumina HiSeq  
122 4000 with 100PE reads in high-output mode at the Hudson Alpha Institute for Biotechnology or  
123 the MD Anderson Sequencing and Microarray Facility. Variants were called using our previously  
124 validated ensemble approach(13, 14), germline polymorphisms were filtered using dbSNP  
125 annotation and the EXAC dataset containing 60,706 healthy individuals(15), and significantly  
126 mutated genes were defined by MutSig2CV(16). Copy number alterations identified by  
127 CopyWriteR(17), which was validated using 3 FL tumors with matched Affymetrix 250K SNP  
128 array (Figure S2), and significant DNA copy number alterations were determined by  
129 GISTIC2(18). Translocations were called using FACTERA(19), which we previously validated  
130 against MYC translocation status determined by FISH(20). Mutation and CNA data are publicly  
131 viewable through cBioPortal: [https://www.cbioportal.org/study/summary?id=mbn\\_mdacc\\_2013](https://www.cbioportal.org/study/summary?id=mbn_mdacc_2013).  
132 Matched gene expression microarray data are available through the Gene Expression Omnibus,  
133 accession GSE132929. For further details, refer to supplementary methods.

134

135

136

## 137 **RESULTS**

### 138 Identification of significantly mutated genes and structural alterations.

139 We used a 380 gene custom targeted sequencing approach, LymphoSeq, to interrogate the  
140 genomes of 685 mature B-NHLs, sequencing to an average depth of 578X (Min, 101X; Max,  
141 1785X; Table S1) for a total yield of 1.81 Tbp. Somatic nucleotide variants (SNVs) and small  
142 insertions/deletions (InDels) were identified using an ensemble approach that we have  
143 previously validated(14) (Table S3) and significantly mutated genes were identified using  
144 MutSig2CV (Table S4). Matched germline DNA was available from purified T-cells of 20 tumors  
145 (11 FL and 9 MCL) and sequenced to validate the filtering of germline variants; 0/632 variants  
146 called within these tumors were identified in the matched germline samples, which indicates that  
147 the filtering of germline variants was effective. Genes that were significantly mutated in the full  
148 cohort or in any one of the 4 subtypes with >100 tumors (BL, DLBCL, FL, MCL) were included,  
149 as well as frequently mutated genes that are targets of AID (Table S5, **Figure 1**). Predictably,  
150 AID-associated mutations were higher in frequency among GC-derived lymphomas (BL,  
151 DLBCL, FL), but also accounted for 7.6% of all coding and non-coding mutations in MCL (Table  
152 S6). The mutational burden calculated from our targeted region significantly correlated with that  
153 from the whole exome (Figure S3A) and was significantly higher in DLBCL and other high-grade  
154 tumors compared to FL and MCL (**Figure 1**; Figure S3B).

155

156 The hybrid capture probes utilized in our design also targeted recurrent breakpoint regions in  
157 the immunoglobulin heavy- and light-chain loci, and recurrent breakpoints in or near the *BCL2*,  
158 *MYC* and *BCL6* genes, and translocations were called using a method that detects discordantly  
159 mapped reads(19) (**Figures 1 and 2A**). Our prior validation of this approach in cases with

160 matched fluorescence in situ hybridization (FISH) data for *MYC* showed that it is 100% specific,  
161 but only ~40% sensitive for translocation detection(13). This limit of sensitivity likely varies for  
162 different genes depending on how well the breakpoints are clustered into hotspots that are  
163 targeted by our capture probes. Nonetheless, we observed a significantly higher fraction of  
164 *BCL6* translocations (57% [27/47]) partnered to non-immunoglobulin loci (eg. *CIITA*, *RHOH*,  
165 *EIF4A2*, *ST6GAL1*; Table S7) compared to *BCL2* (1% [1/114]) and *MYC* (5% [2/38])  
166 translocations (Figure 2A; Fisher P-value <0.001). These were more frequent in FL (88%  
167 [15/17] of *BCL6* translocations) as compared to DLBCL (39% [9/23] of *BCL6* translocations),  
168 presumably because the two immunoglobulin loci in FL are either translocated with the *BCL2*  
169 gene or functioning in immunoglobulin expression(21). We also employed off-target reads to  
170 detect DNA copy number alterations (CNAs) in a manner akin to low-pass whole genome  
171 sequencing, identified significant peaks of copy gain and losses using GISTIC2(18) (**Figures 1**  
172 **and 2A**; Figure S4; Table S8-9), and defined the likely targets of these CNAs by integrative  
173 analysis of matched gene expression profiling (GEP) data from 290 tumors (**Figure 2B-C**,  
174 Figure S4, Table S10-11). This identified known CNA targets, including but not limited to  
175 deletion of *TNFAIP3* (6q24.2)(22), *ATM* (11q22.3)(23), *B2M* (15q15.5)(24) and *PTEN*  
176 (10q23.21)(25), and copy gain of *REL* and *BCL11A* (2p15), and *TCF4* (18q23)(26). In addition,  
177 we identified novel targets such as deletion of *IBTK* (6q14.1), *UBE3A* (11q22.1) and *FBXO25*  
178 (8p23.3), and copy gain of *ATF7* (12q13.13), *UCHL5* (1q31.3), and *KMT2A* (11q23.3).  
179 Importantly, the frequency of DNA copy number alterations in the target genes identified by  
180 NGS-based analysis significantly correlated with those derived from single nucleotide  
181 polymorphism (SNP) microarray-based measurements in independent cohorts of BL, DLBCL,  
182 FL and MCL tumors from previously published studies(6, 20, 26-30) (Figure S5), providing  
183 validation for the accuracy of this approach. The CNA peaks, defined as the smallest and most  
184 statistically significant region, included multiple genes that were significantly mutated (**Figure**  
185 **2D**) as well as other genes for which we detected mutations at lower frequencies that were not

186 significant by MutSig2CV (*POU2AF1*, *TP53BP1*, *FAS*, *PTEN*). Deletions of *ATM*, *B2M*, *BIRC3*  
187 and *TNFRSF14* significantly co-associated with mutations of these genes, suggesting that these  
188 are complementary mechanisms contributing to biallelic inactivation.

189

#### 190 Conserved functional hallmarks of B-NHL.

191 To understand key hallmarks that are deregulated by genetic alterations, we performed  
192 hypergeometric enrichment analysis of genes targeted by recurrent mutations and DNA copy  
193 number alterations using DAVID(31) (Table S12). This revealed a significant enrichment of  
194 multiple overlapping gene sets that could be summarized into hallmark processes associated  
195 with epigenetics and transcription (**Figure 3A**), apoptosis and proliferation (**Figure 3B**),  
196 signaling (**Figure 3C**), and ubiquitination (**Figure 3D**). One or more genes within these  
197 hallmarks was altered in the majority (>50%) of tumors from each of the 4 major histologies  
198 included in this study. Genes annotated in epigenetic-associated gene sets were altered in 72%,  
199 70%, 93% and 50% of BL, DLBCL, FL, and MCL, respectively, whereas genes annotated in  
200 transcription-associated gene sets were altered in 94%, 91%, 95% and 88% of BL, DLBCL, FL,  
201 and MCL, respectively. However, there is an extremely high degree of functional overlap  
202 between epigenetics and transcriptional regulation, as well as overlapping gene set annotations  
203 for many genes, leading us to consider these categories collectively as a single hallmark.  
204 Collectively, genes involved in epigenetics and transcription were mutated in 94% of BL, 92% of  
205 DLBCL, 96% of FL and 89% of MCL, and included those that encode proteins that catalyze  
206 post-translational modifications of histones (*KMT2D*, *CREBBP*, *EZH2*, *EP300*, *WHSC1*,  
207 *ASHL1L* and *KMT2A*), components of the BAF chromatin remodeling complex (*ARID1A*,  
208 *SMARCA4*, *BCL7A*, *BCL11A*), linker histones (*HIST1H1E*, *HIST1H1C*, *HIST1H1B*), and  
209 transcription factors (*BCL6*, *IRF4*, *IRF8*, *TCF3*, *TCF4*, *MYC*, *REL*, *PAX5*, *POU2AF2*, *FOXO1*,  
210 *CIITA*). Genes with a role in signaling included those involved in B-cell receptor (*CD79B*, *ID3*,



211 *TCF3*, *TCF4*, *RFTN1*), NF $\kappa$ B (*TNFAIP3*, *CARD11*, *NFKBIE*), NOTCH (*NOTCH1*, *NOTCH2*),  
212 JAK/STAT (*SOCS1*, *STAT6*), PI3K/mTOR (*FOXO1*, *ATP6V1B2*, *APT6AP1*) and G-protein  
213 (GNA13, GNAI2) signaling. The *CD79A* and *BCL10* genes were also mutated at a lower  
214 frequency that was not significant by MutSig2CV (Figure S6A-B). Among these, the *RFTN1*  
215 gene (Figure S6C) is a novel recurrently mutated gene that was mutated in 7.4% of DLBCL and  
216 encodes a lipid raft protein that is critical for B-cell receptor signaling(32).

217  
218 Deregulation of the ubiquitin proteasome system is important in many cancers(33), but is not a  
219 well-defined hallmark of B-NHL. However, one or more genes with a role in regulating  
220 ubiquitination were genetically altered in 61% of BL, 79% of DLBCL, 61% of FL and 82% of  
221 MCL (**Figure 3D**). These included previously described genetic alterations such as amplification  
222 of *MDM2*(34), deletion of *TNFAIP3*(35) and *CUL4A*(36) and *RPL5*(36), and mutations of  
223 *KLHL6*(37), *DTX1*(38), *UBR5*(39), *SOCS1*(40), and *BIRC3*(6). In addition, we identified novel  
224 targets such as recurrent deletions of *IBTK*, a negative regulator of Bruton's tyrosine kinase  
225 (BTK)(41), and somatic mutation of *CDC27* in 14% of MCL, which encodes an E3 ligase for  
226 CCND1(42). Therefore, common hallmark processes are targeted by genetic alterations in the  
227 majority of major B-NHL subtypes, including genes with a role in regulating protein  
228 ubiquitination.

229  
230 Subtype-specific patterns of genetic alterations.

231 We formally tested the over- or under-representation of recurrent genetic alterations in each of  
232 the 4 subtypes with >100 tumors (BL, DLBCL, FL, MCL), compared to all other tumors in the  
233 study (**Figure 4**; Table S13). We observed some interesting patterns within hallmark  
234 characteristics that differ between subtypes. An illustrative example of this is the alternative

235 avenues for BAF complex perturbation between different histologies (**Figure 5**). Specifically,  
236 mutations of the *SMARCA4* (aka. BRG1) component of the ATPase module were significantly  
237 enriched in BL (24%) compared to other subtypes (4%, Q-value<0.001), while mutations of the  
238 *BCL7A* component of the ATPase module were significantly enriched in FL (11%) compared to  
239 other subtypes (4%, Q-value=0.007). In contrast, mutations of *ARID1A* were frequent in both BL  
240 (19%) and FL (15%), and DNA copy number gains of *BCL11A* were frequent in both DLBCL  
241 (28%) and FL (22%). The BAF complex is therefore a target of recurrent genetic alterations, as  
242 previously suggested(43), but the manner in which this complex is perturbed varies between B-  
243 NHL subtypes (**Figure 5**). Similar disease-specific patterns were also observed for signaling  
244 genes; for example, *TCF3* and *ID3* have important functions in normal germinal center B-  
245 cells(44), but mutations of these genes are specifically enriched within BL and are rarely found  
246 in the other GCB-derived malignancies, DLBCL and FL. Similarly, the *ATP6AP1* and *ATP6V1B2*  
247 genes that function in mTOR signaling(45, 46) are specifically mutated in FL, and the *DUSP2*  
248 gene which inactivates ERK1/2(47) and STAT3(48) is specifically mutated in DLBCL. The  
249 disease-specific patterns of genetic alterations therefore reveal subtle but important differences  
250 in how each subtype of B-NHL perturbs hallmark features.

251

#### 252 Clusters of co-associated genomic alterations in B-NHL subtypes

253 We next defined how each genetic alteration co-associated with or mutually-excluded other  
254 genetic alterations by pairwise assessments using false-discovery rate (FDR)-corrected Fisher's  
255 tests (Table S14). A matrix of the transformed FDR Q-values (-logQ) was used for unsupervised  
256 hierarchical clustering to identify clusters of co-associated genetic alterations. Together with  
257 patterns of disease-specificity, unsupervised clustering revealed clear groupings of co-  
258 associated events for BL, DLBCL, FL and MCL (**Figure 4**). We identified a single cluster of  
259 significantly co-associated genetic alterations that was specifically enriched in BL (Cluster 1),

260 including mutations and translocations of *MYC*, and mutations of *CCND3*, *SMARCA4*, *TCF3*  
261 and *ID3* that have been previously reported in BL(4). A single cluster was significantly enriched  
262 in MCL (Cluster 7), with a high frequency of *ATM* mutations and deletions, as well as other DNA  
263 copy number alterations. Other mutations that were not significantly co-associated were also  
264 enriched in MCL (Cluster 6), such as those in *WHSC1*, *NOTCH1*, *NOTCH2*, *BCOR* and *UBR5*,  
265 though statistical assessment of co-association may be hampered in this context by the low  
266 frequencies of mutations within these genes. A single cluster was also enriched in FL (Cluster  
267 4), with a high prevalence of *KMT2D*, *BCL2*, *CREBBP*, *EZH2* and *TNFRSF14* mutations and  
268 *BCL2* translocations. The genes within cluster 4 also significantly overlapped with the previously  
269 reported C3, EZB and BCL2 clusters from prior whole exome sequencing studies of DLBCL (3,  
270 49, 50) (Fisher test p-values = 0.0006, 0.0148 and 0.0173, respectively). Two clusters (Clusters  
271 2 and 3) were enriched in DLBCL, with lower frequencies of mutations in a larger number of  
272 genes, in line with the genetic heterogeneity of this disease (3, 4). Cluster 2 includes co-  
273 associated genetic alterations that overlapped with the previously described C5, MCD, and  
274 MYD88 clusters (3, 4) (Fisher p-values = 0.0004, 0.0002 and 0.0007, respectively) including  
275 *CD79B*, *MYD88* and *TBL1XR1* mutations. Genes within cluster 3 significantly overlapped with  
276 those in the previously described C4 and SOCS1/SGK1 clusters (Fisher p-values = 0.0002 and  
277 0.0074, respectively), including *SGK1*, *TET2*, *SOCS1* and histone H1 genes. We also identified  
278 a cluster consisting of TP53 mutations and multiple CNAs (Cluster 5) similar to the genetically  
279 complex C2/A53 subtype reported in DLBCL (3, 49), however the overlap of features within  
280 these clusters could not be formally assessed due to differing annotations. The CNAs captured  
281 in this cluster were variably represented across B-NHL subtypes, but were most frequent in  
282 DLBCL. B-NHL subtypes therefore harbor characteristic clusters of co-associated genetic  
283 alterations that likely cooperate in disease etiology.

284

285 Combinations of genetic alterations define molecular subtypes of B-NHL

286 Our data have revealed statistical enrichment of individual genetic alterations in subtypes of B-  
287 NHL, and pairwise relationships between different genetic alterations that define clusters of  
288 subtype-specific events. To validate and expand upon these observations we leveraged gene  
289 expression microarray data from 284 tumors that underwent pathology review and were profiled  
290 as part of prior studies(10-12). We utilized BL, DHL, HGBL-NOS and DLBCL tumors to perform  
291 classification into molecular-defined BL (mBL) and non-mBL using a Bayesian classifier with  
292 previously described marker genes(51), and subclassified non-mBL into activated B-cell (ABC)-  
293 like and germinal center B-cell (GCB)-like subtypes as we have described previously(26)  
294 (Figure S7). We evaluated the frequency of cumulative ( $\geq 2$ ) genetic alterations within each  
295 cluster among mBL, ABC-like DLBCL, GCB-like DLBCL, FL and MCL (**Figure 6**). This showed  
296 that Cluster 1 genetic alterations that were individually enriched in BL are cumulatively acquired  
297 in molecularly-defined BL (mBL), with 87% of tumors having  $\geq 2$  of these alterations compared to  
298 only 22% of GCB-like DLBCL. Similarly, Cluster 4 and Cluster 7 alterations were cumulatively in  
299 77% and 72% of molecularly-annotated FL and MCL, respectively. Cluster 4 mutations were  
300 also cumulatively acquired in 51% of GCB-like DLBCL, likely capturing the C3/EZB/BCL2  
301 subtype that has genetic similarities to FL(3, 4, 50). Furthermore, Cluster 2 and Cluster 4  
302 alterations were cumulatively acquired in 58% of ABC-like DLBCL and 60% of GCB-like DLBCL,  
303 respectively, further supporting their respective overlap with the C5/MCD/MYD88 and C4/ST2  
304 subtypes of DLBCL. CNAs within the Cluster 5 were cumulatively acquired at high but variable  
305 frequencies in all of the subtypes, but showed subtype-specific patterns within this cluster such  
306 as higher frequencies of 18q21 and 18q23 gains in ABC-like DLBCL, and higher frequencies of  
307 chromosome 7 gains in GCB-like DLBCL and FL. B-NHL tumors therefore cumulatively acquire  
308 co-associated sets of genetic alterations in a manner that is characteristically associated with  
309 histologically- and molecularly-defined subsets of disease.

310

311

312

## 313 **DISCUSSION**

314 By performing cross-sectional genomic profiling of a large cohort of tumors, we have developed  
315 a resource of genes and functional hallmarks that are recurrently targeted by genetic alterations  
316 in B-NHL, and shown that the cumulative acquisition of combinations of genetic alterations are  
317 characteristic of histological and molecular subtypes of disease. Some of the functional  
318 hallmarks that we identified have been previously appreciated, with a few exceptions. For  
319 example, the mutation of genes with roles in epigenetic and transcriptional control of gene  
320 expression are known to be a hallmark of FL(52) and we observed that 96% of FL tumors  
321 possessed mutations in one or more of the genes in this category. However, mutations within  
322 these genes were also observed in the majority of BL, DLBCL and MCL tumors, highlighting the  
323 conservation of this functional hallmark across B-NHL subtypes. There are subtype-specific  
324 patterns of chromatin modifying gene alterations, such as those that we highlighted for BAF  
325 complex mutations, but we suggest that the genetic deregulation of epigenetic and  
326 transcriptional control of gene expression should be considered a general hallmark of B-NHL. In  
327 addition, we suggest that the deregulation of the ubiquitin proteasome system is a hallmark of  
328 B-NHL that requires further investigation. Mutations in genes such as *KLHL6*(37) and *UBR5*(39)  
329 have been recently shown to play an important role in B-cell lymphoma, while the roles of other  
330 frequently mutated genes such as *DTX1* and *SOCS1* have not yet been functionally dissected.  
331 Furthermore, while the nature of AID-driven mutations in genes such as *DTX1* and *SOCS1*  
332 remain to be defined, other genes that are recurrently mutated by AID such as *BCL7A* (53) and  
333 linker histone genes (54) have been shown to play driving role in lymphomagenesis. Genetic

334 deregulation of the ubiquitin proteasome system has the potential to influence the activity or  
335 abundance of a range of substrate proteins, and represents a current gap in our knowledge of  
336 B-NHL etiology.

337

338 The role of cooperative interactions between co-occurring genetic alterations is also an  
339 emerging field that requires further investigation. These interactions are not uncommon in  
340 cancer(55), and have been recently highlighted in DLBCL(3, 4), but our data show that they are  
341 pervasive and characteristic features of the B-NHL genetic landscape. Cooperation between co-  
342 associated genetic alterations identified in this study requires formal validation in cell line and/or  
343 animal models. However, there are many instances in which co-occurring genetic alterations  
344 that we observed have already been shown to cooperate in lymphomagenesis. In addition to the  
345 aforementioned example of *MYD88* and *CD79B* mutations, transgenic mouse models of *Ezh2*  
346 activating mutations or conditional deletion of *Crebbp* or *Kmt2d* have shown that these events  
347 are not alone sufficient for lymphomagenesis(56-61). We and others have observed a co-  
348 association between the mutation of these genes and *BCL2* translocations(14, 62), and the  
349 addition of a *Bcl2* transgene to these murine models indeed promoted lymphoma at a  
350 significantly higher rate than that observed with the *Bcl2* transgene alone(56-61). These genetic  
351 alterations are therefore significantly more lymphomagenic in combination than they are alone,  
352 which provides proof of principal that a cooperative relationship exists between these co-  
353 occurring genetic alterations. Future studies focusing on other co-occurring mutations, such as  
354 *MYC* translocation and *SMARCA4* mutation in BL, *CREBBP* and *KMT2D* mutation in FL, *TCF4*  
355 copy gain and *MYD88* mutation in DLBCL, and *ATM* mutation and *RPL5* deletion in MCL,  
356 should therefore be performed to further explore these concepts and define their underlying  
357 functional relationship. We suggest that combinations of genetic alterations are likely to more  
358 accurately recapitulate the biology of B-NHL than single gene models, and may reveal

359 contextually different functional roles of genetic alterations depending on the co-occurring  
360 events.

361

362 The caveats of this study include the targeted nature of the LymphoSeq platform which may  
363 preclude consideration of a subset of important genes, the lack of germline DNA for the majority  
364 of samples that may lead to a small number of germ-line variants being falsely assigned as  
365 somatic, and the sample size for any given histological subtype being below that required to  
366 identify genes that are mutated at low frequency. Nonetheless, these data represent the first  
367 broad cross-sectional analysis of multiple histological and molecular subtypes of B-NHL using  
368 the same methodology and provide a framework of functional hallmarks and co-occurring  
369 genetic alterations that are enriched within these subtypes of B-NHL. These functional  
370 hallmarks are genetically perturbed in the majority of B-NHLs, but our cross-sectional approach  
371 enabled us to elucidate subtype-specific preferences for genetic alterations within each  
372 functional hallmark. Furthermore, the subtype-specific clusters of co-occurring genetic  
373 alterations likely represent cooperative interactions that underpin the biology of different  
374 subtypes of B-NHL. These combinations identify opportunities for moving from single-allele to  
375 multi-allele designs in cell line or animal models to better understand the molecular etiology of  
376 B-NHL subtypes. Together, these hallmarks and clusters of co-associated genetic alterations  
377 represent processes that are potentially drugable with targeted therapies (63-66), but that are  
378 likely influenced in a non-binary fashion by different combinations of genetic alterations.  
379 Deciphering the relationships between complex sets of genetic alterations and targetable  
380 dependencies will be a next step towards developing new rationally targeted therapeutic  
381 strategies in B-NHL.

382

383 **ACKNOWLEDGEMENTS**

384 This research was supported by NCI R01CA201380 (MRG), the Nebraska Department of  
385 Health and Human Services (LB506 2016-17; MRG), and NCI cancer center support grants to  
386 the University of Texas MD Anderson Cancer Center (P30 CA016672) and the Fred & Pamela  
387 Buffet Cancer Center (P30 CA036727). HY is supported by a Fellow award from the Leukemia  
388 and Lymphoma Society. MRG is supported by a Scholar award from the Leukemia and  
389 Lymphoma Society and an Andrew Sabin Family Foundation Fellow award.

390

391 **AUTHOR CONTRIBUTIONS**

392 MCJMA and ST performed experiments, analyzed data and wrote the manuscript. AB analyzed  
393 data. TH, HY, QD, DM, KH, NJ, JS, and SG performed experiments. AA, LS, MD, CC, JT, DP,  
394 KMV, MAL, ARS, BJC, RB, SN, LN, RED, JW, SP, MG, DS, KB, JI, SR, and AM provided  
395 samples and/or clinical data. MRG conceived and supervised the study, performed experiments,  
396 analyzed the data and wrote the manuscript. All authors reviewed and approved the manuscript.

397

398 **DISCLOSURES OF CONFLICTS OF INTEREST**

399 The authors have no conflicts of interest related to this work.

400

401 **REFERENCES**

- 402 1. Swerdlow SH, Campo E, Pileri SA, Harris NL, Stein H, Siebert R, et al. The 2016  
403 revision of the World Health Organization classification of lymphoid neoplasms. *Blood*. 2016  
404 May 19;127(20):2375-90.  
405 2. Armitage JO, Gascoyne RD, Lunning MA, Cavalli F. Non-Hodgkin lymphoma. *Lancet*.  
406 2017 Jul 15;390(10091):298-310.



- 407 3. Chapuy B, Stewart C, Dunford AJ, Kim J, Kamburov A, Redd RA, et al. Molecular  
408 subtypes of diffuse large B cell lymphoma are associated with distinct pathogenic mechanisms  
409 and outcomes. *Nature medicine*. 2018 Apr 30;24(5):679-90.
- 410 4. Schmitz R, Wright GW, Huang DW, Johnson CA, Phelan JD, Wang JQ, et al. Genetics  
411 and Pathogenesis of Diffuse Large B-Cell Lymphoma. *The New England journal of medicine*.  
412 2018 Apr 12;378(15):1396-407.
- 413 5. Reddy A, Zhang J, Davis NS, Moffitt AB, Love CL, Waldrop A, et al. Genetic and  
414 Functional Drivers of Diffuse Large B Cell Lymphoma. *Cell*. 2017 Oct 05;171(2):481-94 e15.
- 415 6. Bea S, Valdes-Mas R, Navarro A, Salaverria I, Martin-Garcia D, Jares P, et al.  
416 Landscape of somatic mutations and clonal evolution in mantle cell lymphoma. *Proceedings of  
417 the National Academy of Sciences of the United States of America*. 2013 Nov 5;110(45):18250-  
418 5.
- 419 7. Zhang J, Jima D, Moffitt AB, Liu Q, Czader M, Hsi ED, et al. The genomic landscape of  
420 mantle cell lymphoma is related to the epigenetically determined chromatin state of normal B  
421 cells. *Blood*. 2014 May 08;123(19):2988-96.
- 422 8. Green MR, Alizadeh AA. Common progenitor cells in mature B-cell malignancies:  
423 implications for therapy. *Current opinion in hematology*. 2014 Jul;21(4):333-40.
- 424 9. Wang JQ, Jeelall YS, Humburg P, Batchelor EL, Kaya SM, Yoo HM, et al. Synergistic  
425 cooperation and crosstalk between MYD88L265P and mutations that dysregulate CD79B and  
426 surface IgM. *The Journal of experimental medicine*. 2017 Jul 12;214(9):2759-76.
- 427 10. Lenz G, Wright G, Dave SS, Xiao W, Powell J, Zhao H, et al. Stromal gene signatures in  
428 large-B-cell lymphomas. *The New England journal of medicine*. 2008 Nov 27;359(22):2313-23.
- 429 11. Dave SS, Fu K, Wright GW, Lam LT, Klun P, Boerma EJ, et al. Molecular diagnosis of  
430 Burkitt's lymphoma. *The New England journal of medicine*. 2006 Jun 8;354(23):2431-42.
- 431 12. Iqbal J, Shen Y, Liu Y, Fu K, Jaffe ES, Liu C, et al. Genome-wide miRNA profiling of  
432 mantle cell lymphoma reveals a distinct subgroup with poor prognosis. *Blood*. 2012 May  
433 24;119(21):4939-48.
- 434 13. Bouska A, Bi C, Lone W, Zhang W, Kedwani A, Heavican T, et al. Adult High Grade B-  
435 cell Lymphoma with Burkitt Lymphoma Signature: Genomic features and Potential Therapeutic  
436 Targets. *Blood*. 2017 Aug 11.
- 437 14. Green MR, Kihira S, Liu CL, Nair RV, Salari R, Gentles AJ, et al. Mutations in early  
438 follicular lymphoma progenitors are associated with suppressed antigen presentation.  
439 *Proceedings of the National Academy of Sciences of the United States of America*. 2015 Mar  
440 10;112(10):E1116-25.
- 441 15. Lek M, Karczewski KJ, Minikel EV, Samocha KE, Banks E, Fennell T, et al. Analysis of  
442 protein-coding genetic variation in 60,706 humans. *Nature*. 2016 Aug 18;536(7616):285-91.
- 443 16. Lawrence MS, Stojanov P, Polak P, Kryukov GV, Cibulskis K, Sivachenko A, et al.  
444 Mutational heterogeneity in cancer and the search for new cancer-associated genes. *Nature*.  
445 2013 Jul 11;499(7457):214-8.
- 446 17. Kuilman T, Velds A, Kemper K, Ranzani M, Bombardelli L, Hoogstraat M, et al.  
447 CopywriteR: DNA copy number detection from off-target sequence data. *Genome biology*.  
448 2015;16:49.
- 449 18. Mermel CH, Schumacher SE, Hill B, Meyerson ML, Beroukhi R, Getz G. GISTIC2.0  
450 facilitates sensitive and confident localization of the targets of focal somatic copy-number  
451 alteration in human cancers. *Genome biology*. 2011;12(4):R41.
- 452 19. Newman AM, Bratman SV, Stehr H, Lee LJ, Liu CL, Diehn M, et al. FACTERA: a  
453 practical method for the discovery of genomic rearrangements at breakpoint resolution.  
454 *Bioinformatics*. 2014 Dec 1;30(23):3390-3.
- 455 20. Bouska A, Bi C, Lone W, Zhang W, Kedwani A, Heavican T, et al. Adult high-grade B-cell  
456 lymphoma with Burkitt lymphoma signature: genomic features and potential therapeutic targets.  
457 *Blood*. 2017 Oct 19;130(16):1819-31.

- 458 21. Akasaka T, Lossos IS, Levy R. BCL6 gene translocation in follicular lymphoma: a  
459 harbinger of eventual transformation to diffuse aggressive lymphoma. *Blood*. 2003 Aug  
460 15;102(4):1443-8.
- 461 22. Kato M, Sanada M, Kato I, Sato Y, Takita J, Takeuchi K, et al. Frequent inactivation of  
462 A20 in B-cell lymphomas. *Nature*. 2009 Jun 04;459(7247):712-6.
- 463 23. Greiner TC, Dasgupta C, Ho VV, Weisenburger DD, Smith LM, Lynch JC, et al. Mutation  
464 and genomic deletion status of ataxia telangiectasia mutated (ATM) and p53 confer specific  
465 gene expression profiles in mantle cell lymphoma. *Proceedings of the National Academy of  
466 Sciences of the United States of America*. 2006 Feb 14;103(7):2352-7.
- 467 24. Challa-Malladi M, Lieu YK, Califano O, Holmes AB, Bhagat G, Murty VV, et al.  
468 Combined genetic inactivation of beta2-Microglobulin and CD58 reveals frequent escape from  
469 immune recognition in diffuse large B cell lymphoma. *Cancer cell*. 2011 Dec 13;20(6):728-40.
- 470 25. Pfeifer M, Grau M, Lenze D, Wenzel SS, Wolf A, Wollert-Wulf B, et al. PTEN loss  
471 defines a PI3K/AKT pathway-dependent germinal center subtype of diffuse large B-cell  
472 lymphoma. *Proceedings of the National Academy of Sciences of the United States of America*.  
473 2013 Jul 23;110(30):12420-5.
- 474 26. Jain N, Hartert K, Tadros S, Fiskus W, Havranek O, Ma M, et al. Targetable genetic  
475 alterations of TCF4 (E2-2) drive immunoglobulin expression in the activated B-cell subtype of  
476 diffuse large B-cell lymphoma. *Sci Transl Med*. 2019;11(497):eeav5599.
- 477 27. Kim D, Fiske BP, Birsoy K, Freinkman E, Kami K, Possemato RL, et al. SHMT2 drives  
478 glioma cell survival in ischaemia but imposes a dependence on glycine clearance. *Nature*. 2015  
479 Apr 16;520(7547):363-7.
- 480 28. Rosenwald A, Wright G, Wiestner A, Chan WC, Connors JM, Campo E, et al. The  
481 proliferation gene expression signature is a quantitative integrator of oncogenic events that  
482 predicts survival in mantle cell lymphoma. *Cancer cell*. 2003 Feb;3(2):185-97.
- 483 29. Salaverria I, Royo C, Carvajal-Cuenca A, Clot G, Navarro A, Valera A, et al. CCND2  
484 rearrangements are the most frequent genetic events in cyclin D1(-) mantle cell lymphoma.  
485 *Blood*. 2013 Feb 21;121(8):1394-402.
- 486 30. Green MR, Vicente-Duenas C, Romero-Camarero I, Long Liu C, Dai B, Gonzalez-  
487 Herrero I, et al. Transient expression of Bcl6 is sufficient for oncogenic function and induction of  
488 mature B-cell lymphoma. *Nature communications*. 2014;5:3904.
- 489 31. Huang da W, Sherman BT, Lempicki RA. Systematic and integrative analysis of large  
490 gene lists using DAVID bioinformatics resources. *Nature protocols*. 2009;4(1):44-57.
- 491 32. Saeki K, Miura Y, Aki D, Kurosaki T, Yoshimura A. The B cell-specific major raft protein,  
492 Raftlin, is necessary for the integrity of lipid raft and BCR signal transduction. *EMBO J*. 2003  
493 Jun 16;22(12):3015-26.
- 494 33. Senft D, Qi J, Ronai ZA. Ubiquitin ligases in oncogenic transformation and cancer  
495 therapy. *Nature reviews Cancer*. 2018 Feb;18(2):69-88.
- 496 34. Monti S, Chapuy B, Takeyama K, Rodig SJ, Hao Y, Yeda KT, et al. Integrative analysis  
497 reveals an outcome-associated and targetable pattern of p53 and cell cycle deregulation in  
498 diffuse large B cell lymphoma. *Cancer cell*. 2012 Sep 11;22(3):359-72.
- 499 35. Honma K, Tsuzuki S, Nakagawa M, Tagawa H, Nakamura S, Morishima Y, et al.  
500 TNFAIP3/A20 functions as a novel tumor suppressor gene in several subtypes of non-Hodgkin  
501 lymphomas. *Blood*. 2009 Sep 17;114(12):2467-75.
- 502 36. Hartmann EM, Campo E, Wright G, Lenz G, Salaverria I, Jares P, et al. Pathway  
503 discovery in mantle cell lymphoma by integrated analysis of high-resolution gene expression  
504 and copy number profiling. *Blood*. 2010 Aug 12;116(6):953-61.
- 505 37. Choi J, Lee K, Ingvarsdottir K, Bonasio R, Saraf A, Florens L, et al. Loss of KLHL6  
506 promotes diffuse large B-cell lymphoma growth and survival by stabilizing the mRNA decay  
507 factor roquin2. *Nat Cell Biol*. 2018 May;20(5):586-96.

- 508 38. Meriranta L, Pasanen A, Louhimo R, Cervera A, Alkodsji A, Autio M, et al. Deltex-1  
509 mutations predict poor survival in diffuse large B-cell lymphoma. *Haematologica*. 2017  
510 May;102(5):e195-e8.
- 511 39. Swenson SA, Gilbreath TJ, Vahle H, Hynes-Smith RW, Graham JH, Law HC, et al.  
512 UBR5 HECT domain mutations identified in mantle cell lymphoma control maturation of B cells.  
513 *Blood*. 2020 Jul 16;136(3):299-312.
- 514 40. Mottok A, Renne C, Seifert M, Oppermann E, Bechstein W, Hansmann ML, et al.  
515 Inactivating SOCS1 mutations are caused by aberrant somatic hypermutation and restricted to a  
516 subset of B-cell lymphoma entities. *Blood*. 2009 Nov 12;114(20):4503-6.
- 517 41. Liu W, Quinto I, Chen X, Palmieri C, Rabin RL, Schwartz OM, et al. Direct inhibition of  
518 Bruton's tyrosine kinase by IBtk, a Btk-binding protein. *Nature immunology*. 2001 Oct;2(10):939-  
519 46.
- 520 42. Pawar SA, Sarkar TR, Balamurugan K, Sharan S, Wang J, Zhang Y, et al. C/EBP{delta}  
521 targets cyclin D1 for proteasome-mediated degradation via induction of CDC27/APC3  
522 expression. *Proceedings of the National Academy of Sciences of the United States of America*.  
523 2010 May 18;107(20):9210-5.
- 524 43. Krysiak K, Gomez F, White BS, Matlock M, Miller CA, Trani L, et al. Recurrent somatic  
525 mutations affecting B-cell receptor signaling pathway genes in follicular lymphoma. *Blood*. 2017  
526 Jan 26;129(4):473-83.
- 527 44. Gloury R, Zotos D, Zuidschewoude M, Masson F, Liao Y, Hasbold J, et al. Dynamic  
528 changes in Id3 and E-protein activity orchestrate germinal center and plasma cell development.  
529 *The Journal of experimental medicine*. 2016 May 30;213(6):1095-111.
- 530 45. Okosun J, Wolfson RL, Wang J, Araf S, Wilkins L, Castellano BM, et al. Recurrent  
531 mTORC1-activating RRAGC mutations in follicular lymphoma. *Nature genetics*. 2016  
532 Feb;48(2):183-8.
- 533 46. Wang F, Gatica D, Ying ZX, Peterson LF, Kim P, Bernard D, et al. Follicular lymphoma-  
534 associated mutations in vacuolar ATPase ATP6V1B2 activate autophagic flux and mTOR. *The*  
535 *Journal of clinical investigation*. 2019 Mar 4;130:1626-40.
- 536 47. Hu J, Li L, Chen H, Zhang G, Liu H, Kong R, et al. MiR-361-3p regulates ERK1/2-  
537 induced EMT via DUSP2 mRNA degradation in pancreatic ductal adenocarcinoma. *Cell Death*  
538 *Dis*. 2018 Jul 24;9(8):807.
- 539 48. Lu D, Liu L, Ji X, Gao Y, Chen X, Liu Y, et al. The phosphatase DUSP2 controls the  
540 activity of the transcription activator STAT3 and regulates TH17 differentiation. *Nature*  
541 *immunology*. 2015 Dec;16(12):1263-73.
- 542 49. Wright GW, Huang DW, Phelan JD, Coulibaly ZA, Roulland S, Young RM, et al. A  
543 Probabilistic Classification Tool for Genetic Subtypes of Diffuse Large B Cell Lymphoma with  
544 Therapeutic Implications. *Cancer cell*. 2020 Apr 13;37(4):551-68 e14.
- 545 50. Lacy SE, Barrans SL, Beer PA, Painter D, Smith AG, Roman E, et al. Targeted  
546 sequencing in DLBCL, molecular subtypes, and outcomes: a Haematological Malignancy  
547 Research Network report. *Blood*. 2020 May 14;135(20):1759-71.
- 548 51. Hummel M, Bentink S, Berger H, Klapper W, Wessendorf S, Barth TF, et al. A biologic  
549 definition of Burkitt's lymphoma from transcriptional and genomic profiling. *The New England*  
550 *journal of medicine*. 2006 Jun 8;354(23):2419-30.
- 551 52. Green MR. Chromatin modifying gene mutations in follicular lymphoma. *Blood*. 2018 Feb  
552 8;131(6):595-604.
- 553 53. Balinas-Gavira C, Rodriguez MI, Andrades A, Cuadros M, Alvarez-Perez JC, Alvarez-  
554 Prado AF, et al. Frequent mutations in the amino-terminal domain of BCL7A impair its tumor  
555 suppressor role in DLBCL. *Leukemia*. 2020 Oct;34(10):2722-35.
- 556 54. Yusufova N, Kloetgen A, Teater M, Osunsade A, Camarillo JM, Chin CR, et al. Histone  
557 H1 loss drives lymphoma by disrupting 3D chromatin architecture. *Nature*. 2020 Dec 9.

- 558 55. Ashworth A, Lord CJ, Reis-Filho JS. Genetic interactions in cancer progression and  
559 treatment. *Cell*. 2011 Apr 1;145(1):30-8.
- 560 56. Beguelin W, Popovic R, Teater M, Jiang Y, Bunting KL, Rosen M, et al. EZH2 is required  
561 for germinal center formation and somatic EZH2 mutations promote lymphoid transformation.  
562 *Cancer cell*. 2013 May 13;23(5):677-92.
- 563 57. Garcia-Ramirez I, Tadros S, Gonzalez-Herrero I, Martin-Lorenzo A, Rodriguez-  
564 Hernandez G, Moore D, et al. Crebbp loss cooperates with Bcl2 over-expression to promote  
565 lymphoma in mice. *Blood*. 2017 Mar 13;129(19):2645-56.
- 566 58. Zhang J, Vlasevska S, Wells VA, Nataraj S, Holmes AB, Duval R, et al. The Crebbp  
567 Acetyltransferase is a Haploinsufficient Tumor Suppressor in B Cell Lymphoma. *Cancer*  
568 *discovery*. 2017 Jan 09;7(3):322-37.
- 569 59. Jiang Y, Ortega-Molina A, Geng H, Ying HY, Hatzi K, Parsa S, et al. CREBBP  
570 Inactivation Promotes the Development of HDAC3-Dependent Lymphomas. *Cancer discovery*.  
571 2017 Jan;7(1):38-53.
- 572 60. Zhang J, Dominguez-Sola D, Hussein S, Lee JE, Holmes AB, Bansal M, et al. Disruption  
573 of KMT2D perturbs germinal center B cell development and promotes lymphomagenesis.  
574 *Nature medicine*. 2015 Oct;21(10):1190-8.
- 575 61. Ortega-Molina A, Boss IW, Canela A, Pan H, Jiang Y, Zhao C, et al. The histone lysine  
576 methyltransferase KMT2D sustains a gene expression program that represses B cell lymphoma  
577 development. *Nature medicine*. 2015 Oct;21(10):1199-208.
- 578 62. Morin RD, Mendez-Lago M, Mungall AJ, Goya R, Mungall KL, Corbett RD, et al.  
579 Frequent mutation of histone-modifying genes in non-Hodgkin lymphoma. *Nature*. 2011 Aug  
580 18;476(7360):298-303.
- 581 63. Sermer D, Pasqualucci L, Wendel HG, Melnick A, Younes A. Emerging epigenetic-  
582 modulating therapies in lymphoma. *Nature reviews Clinical oncology*. 2019 Aug;16(8):494-507.
- 583 64. Shen M, Schmitt S, Buac D, Dou QP. Targeting the ubiquitin-proteasome system for  
584 cancer therapy. *Expert Opin Ther Targets*. 2013 Sep;17(9):1091-108.
- 585 65. Merino D, Kelly GL, Lessene G, Wei AH, Roberts AW, Strasser A. BH3-Mimetic Drugs:  
586 Blazing the Trail for New Cancer Medicines. *Cancer cell*. 2018 Dec 10;34(6):879-91.
- 587 66. Roschewski M, Staudt LM, Wilson WH. Diffuse large B-cell lymphoma-treatment  
588 approaches in the molecular era. *Nature reviews Clinical oncology*. 2014 Jan;11(1):12-23.

589

590

591

592

593

594

595

596

597

598

599

600

601

602

### 603 **FIGURE LEGENDS**

604 **Figure 1: Recurrently mutated genes in B-NHL subtypes.** An oncoplot shows significantly  
605 mutated genes, DNA copy number alterations and translocations (Tx.) across our cohort of 685  
606 B-NHL tumors. Mutation types and frequencies are summarized for each gene/CNA on the  
607 right, and the mutational burden for each case are shown at the top.

608

609 **Figure 2: Structural alterations in B-NHL subtypes. A)** A circos plot shows translocations of  
610 the MYC (purple), BCL2 (orange) and BCL6 (green) genes, and GISTIC tracks of DNA copy  
611 number gains (red) and losses (blue). **B-C)** Volcano plots of integrative analysis results showing  
612 the changes in gene expression of genes within peaks of DNA copy number gain (B) or loss (C).  
613 Positive T-test score indicate increased expression in tumors with a given CNA, and vice versa.  
614 Significant genes with the correct directionality are highlighted in the shaded areas. **D)**  
615 Oncoplots show the overlap of structural alterations and mutations that target the same genes.  
616 P-values are derived from a Fisher's exact test (ns, not significant).

617



618 **Figure 3: Functional enrichment of targets of somatic mutations and DNA copy number**  
619 **alterations.** Genes targeted by somatic mutation and/or DNA copy number alteration were  
620 evaluated for enrichment in curated gene sets, and significant gene sets subsequently grouped  
621 according to overlapping gene set membership and functional similarity. In addition to genes  
622 assigned by DAVID (purple), some genes were manually curated into hallmark processes by  
623 literature review of their function (pink). Enriched gene sets could be summarized into 4 major  
624 hallmark processes, including (A) epigenetic and transcriptional control of gene expression, (B)  
625 regulation of apoptosis and proliferation, (C) regulation of signaling pathway activity, and (D)  
626 regulation of protein ubiquitination. The frequency of each genetic alteration is shown for each  
627 of the 4 major histologies included in this study, and the fraction of tumors in each histology  
628 bearing genetic alterations of one or more of the genes is summarized by a pie graph at the  
629 bottom for each hallmark. HMT, histone methyltransferase. HAT, histone acetyltransferase.  
630 DDR, DNA damage response. BCR, B-cell receptor.

631  
632 **Figure 4: Subtype-specific clusters of co-occurring genetic alterations.** The frequency (bar  
633 graph) and over/under-representation (blue to red scale) of mutations and structural alterations  
634 is shown on the left for BL, DLBCL, FL and MCL. The correlation matrix of co-associated  
635 (green) and mutually-exclusive (purple) relationships was clustered to identify 7 groups of co-  
636 occurring genetic alterations that were predominantly over-represented in a single B-NHL  
637 subtype.

638  
639 **Figure 5: Subtype-specific patterns of BAF complex mutations. A)** An oncoplot shows the  
640 frequency of genetic alterations in genes that encode components of the BAF complex. **B)** A  
641 schematic of the BAF complex shows recurrently mutated genes, *ARID1A*, *SMARCA4* and

642 *BCL7A*, and the *BCL11A* gene that is targeted by 2p15 DNA copy number gains. **C-E)** Lollipop  
643 plots show the distribution of mutations in the BAF components *ARID1A* (C), *SMARCA4* (D),  
644 and *BCL7A* (E). **F)** A heatplot shows the location of chromosome 2p DNA copy number gains  
645 (red) ordered from highest DNA copy number (top) to lowest (bottom, copy number = 2.2). The  
646 *BCL11A* gene is in the peak focal copy gain.

647

648 **Figure 6: Cumulative acquisition of co-occurring genetic alterations.** **A)** An oncoplot shows  
649 the presence or absence of genetic alterations according to their clusters of co-association in  
650 molecularly-defined Burkitt Lymphoma (mBL), activated B-cell (ABC)-like DLBCL, germinal  
651 center B-cell (GCB)-like DLBCL, FL and MCL with available gene expression microarray data.  
652 Shading shows histological or molecular subtypes with  $\geq 50\%$  of tumors bearing  $\geq 2$  genetic  
653 alterations within a given cluster. **B)** Bar plots shows the frequency of tumors with  $\geq 2$  genetic  
654 alterations from each cluster.

# Figure 1

bioRxiv preprint doi: <https://doi.org/10.1101/674259>; this version posted February 15, 2021. The copyright holder for this preprint (which was not certified by peer review) is the author/funder, who has granted bioRxiv a license to display the preprint in perpetuity. It is made available under aCC-BY-NC-ND 4.0 International license.

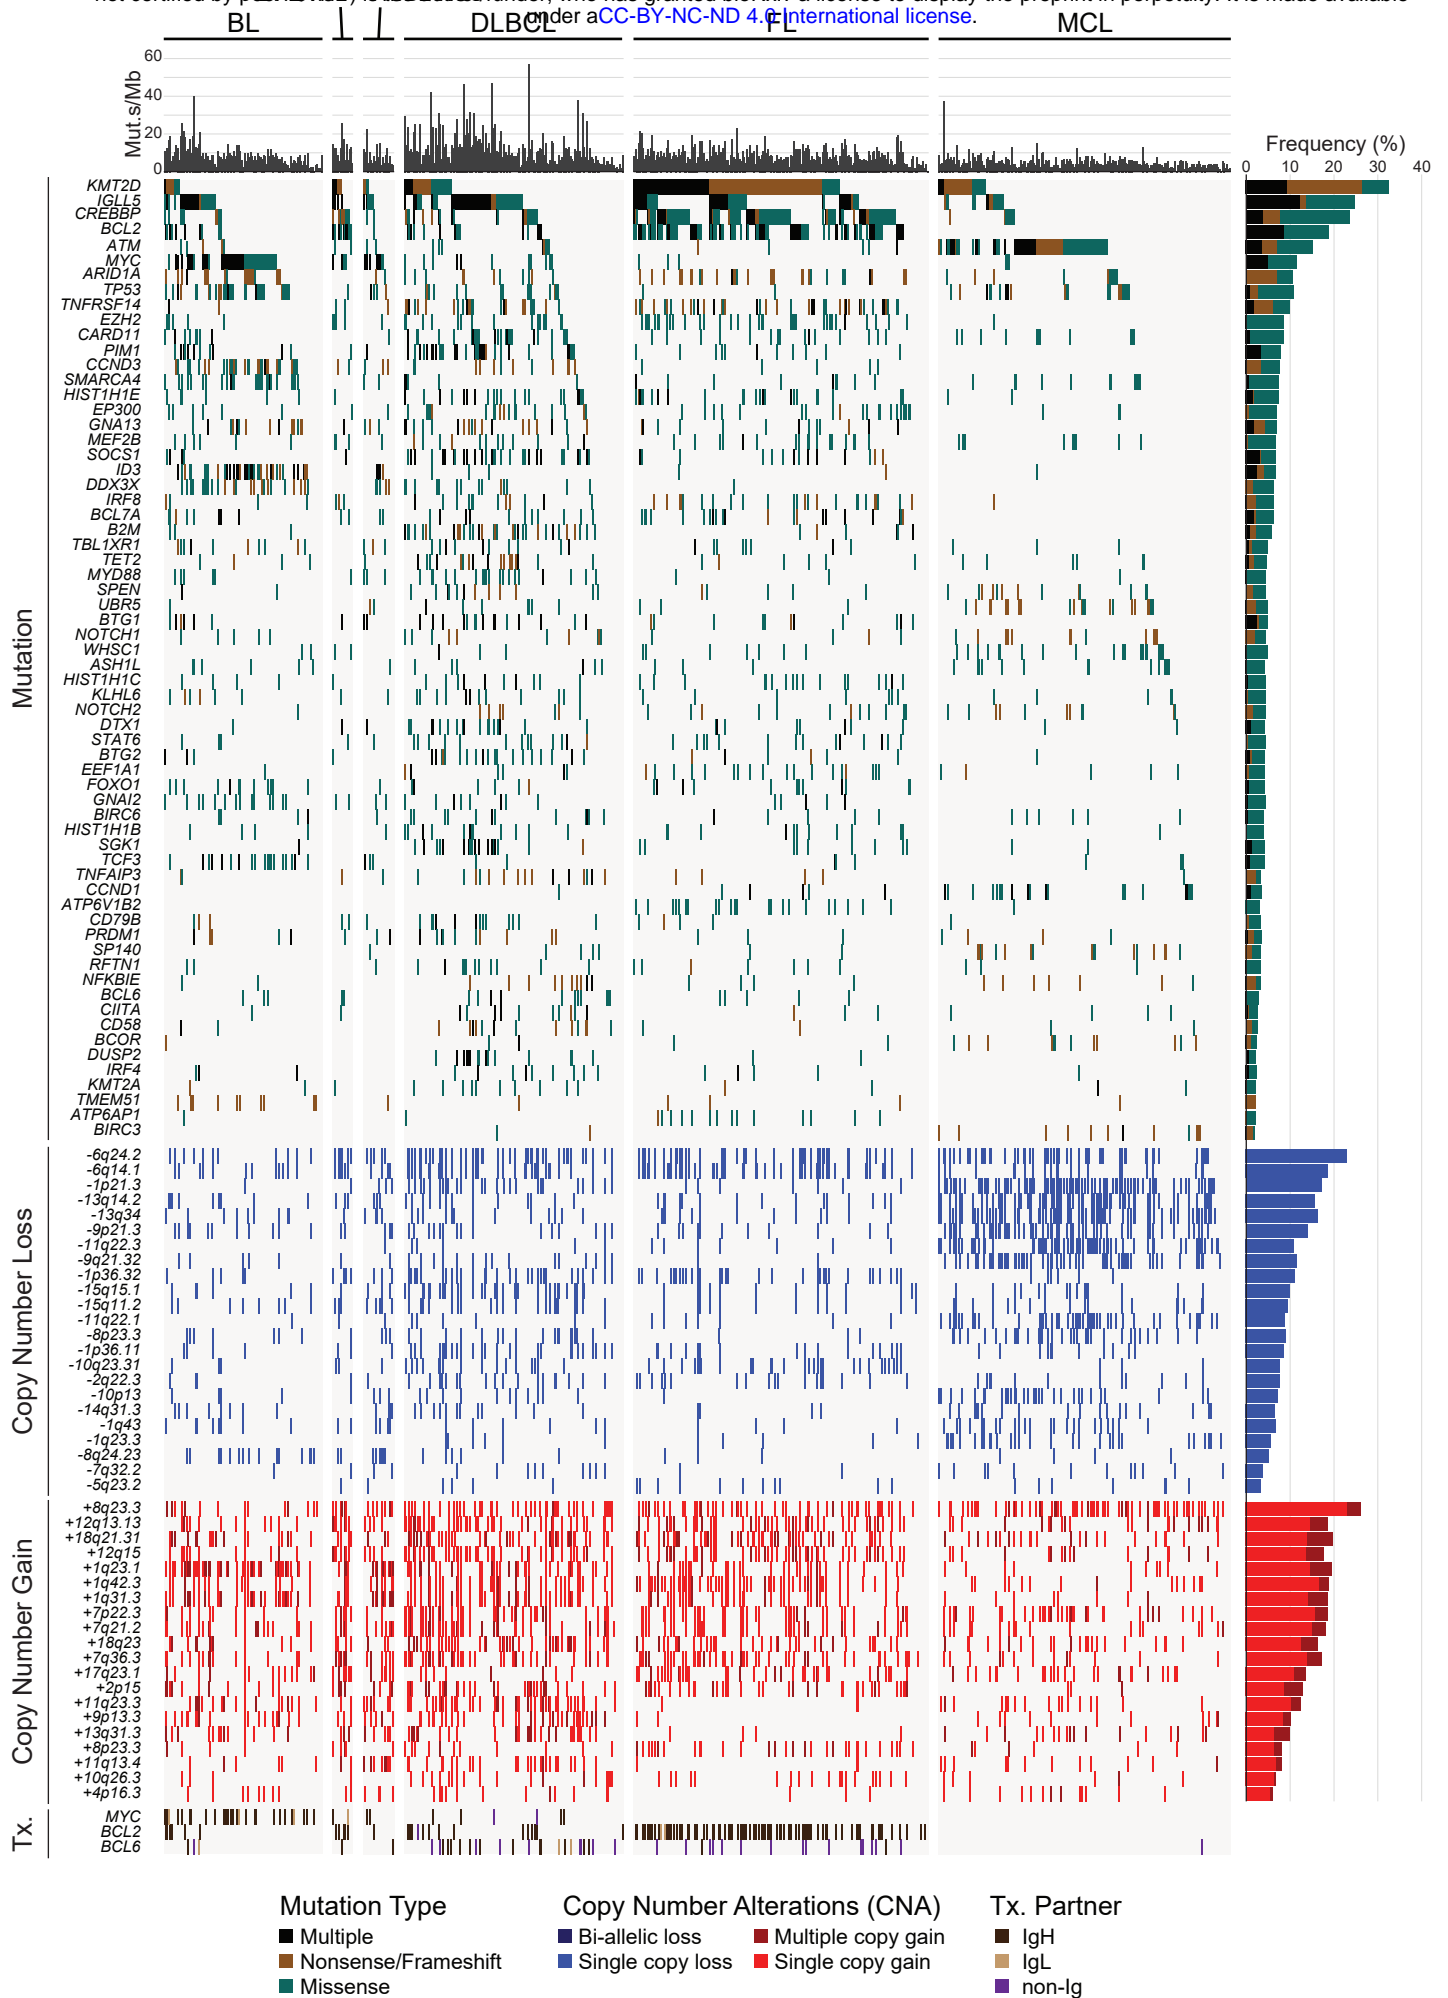



# Figure 2

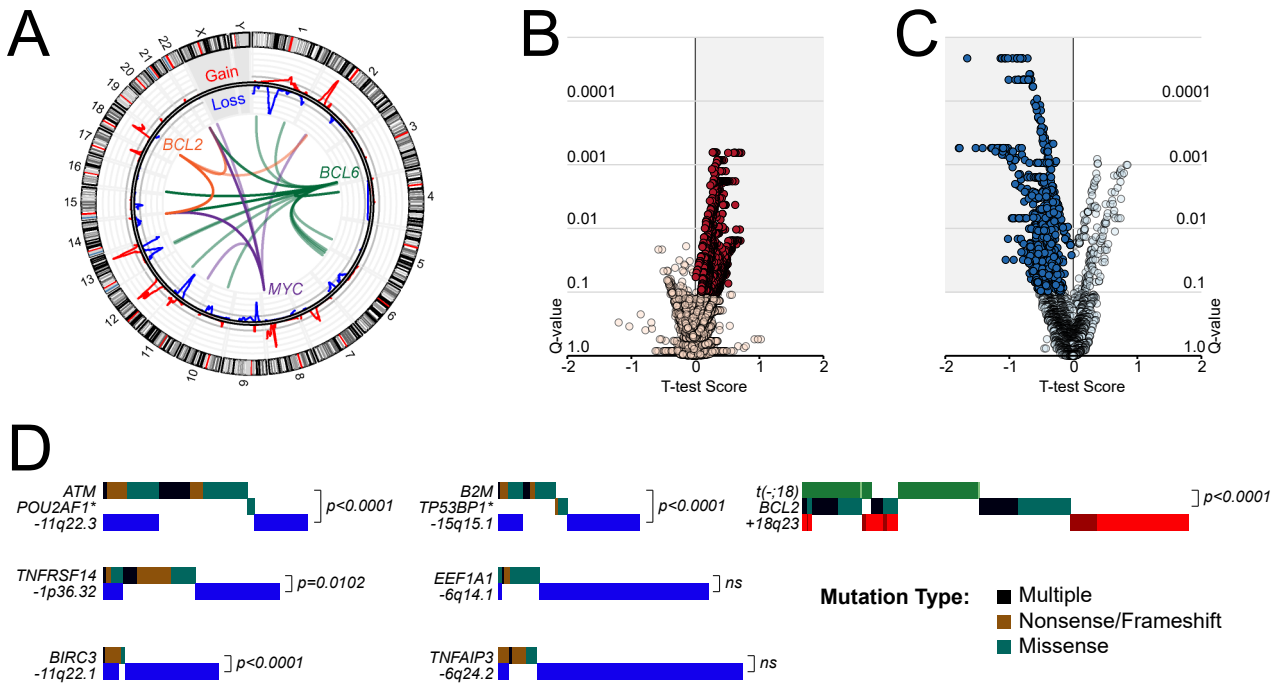

# Figure 3

## A

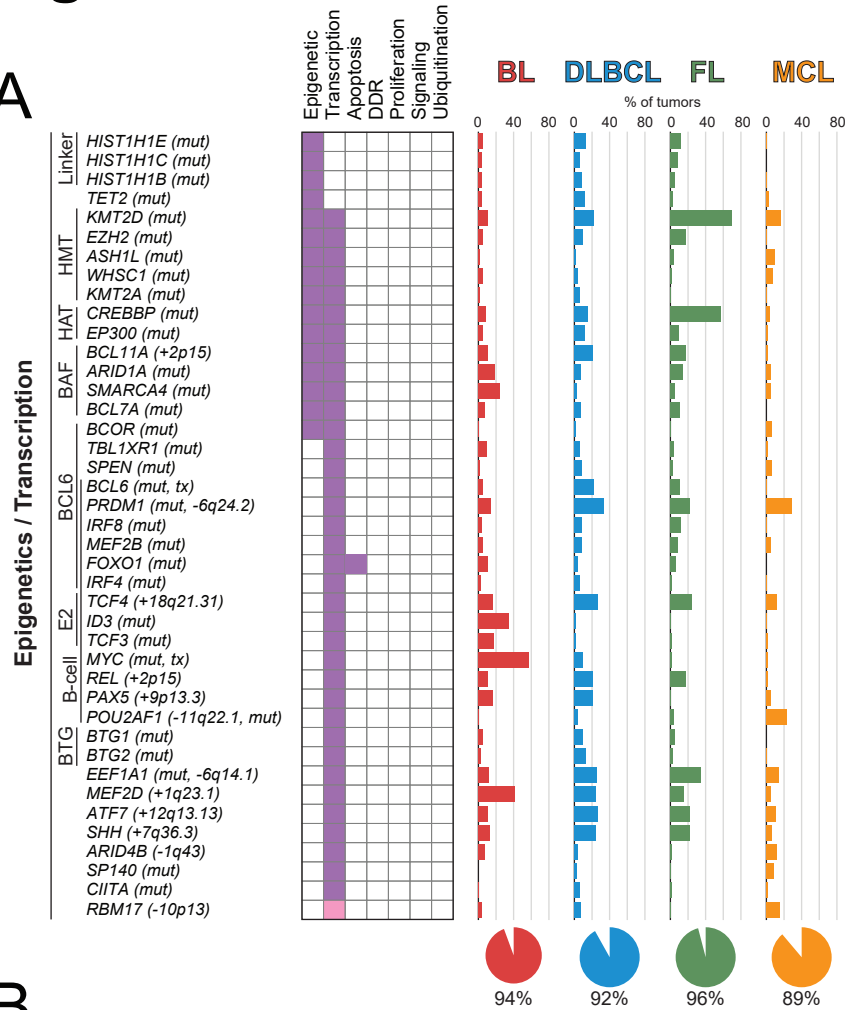

## B

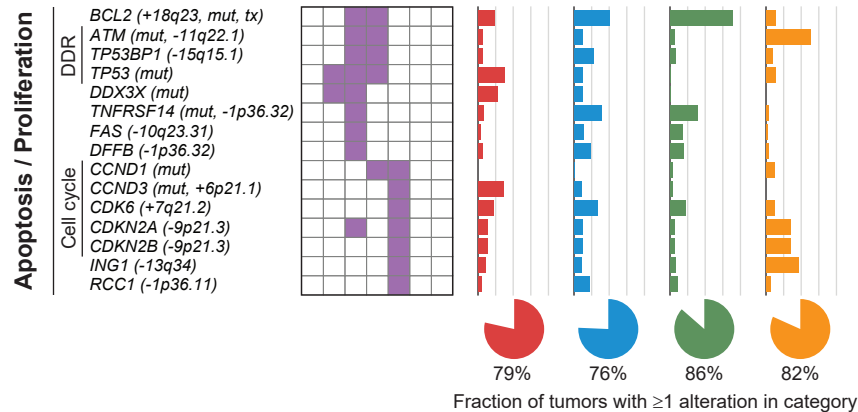

## C

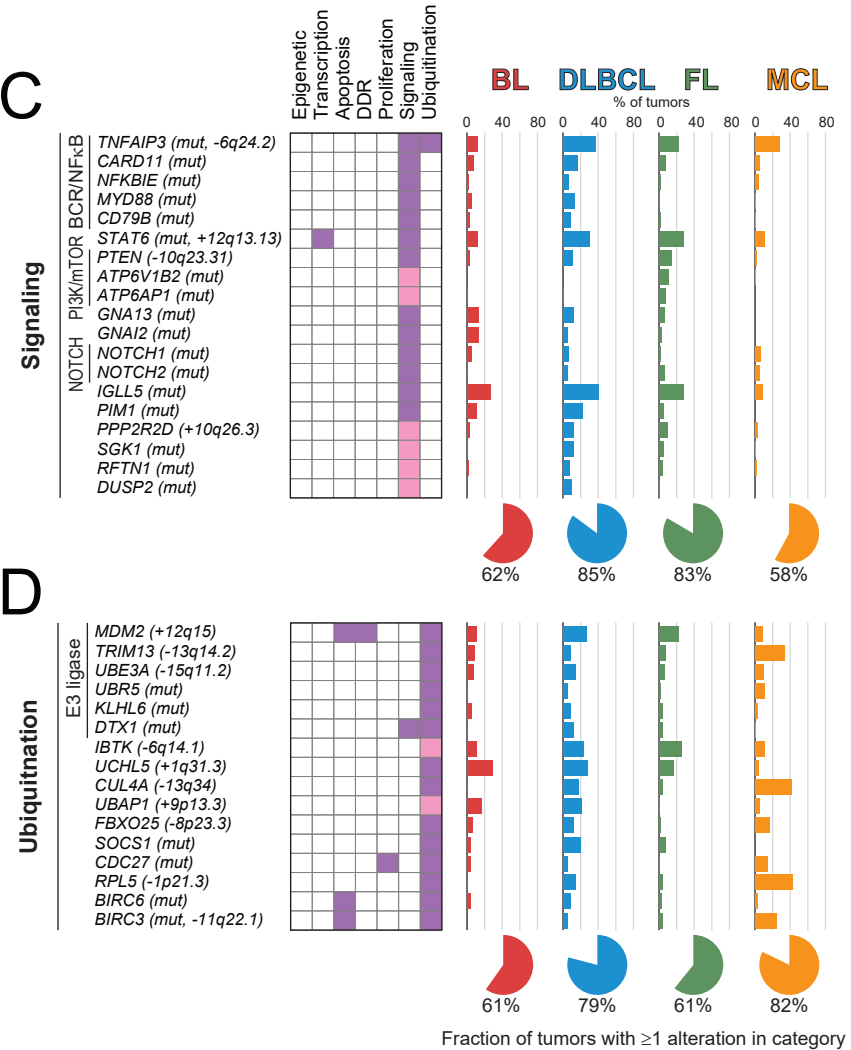

## D

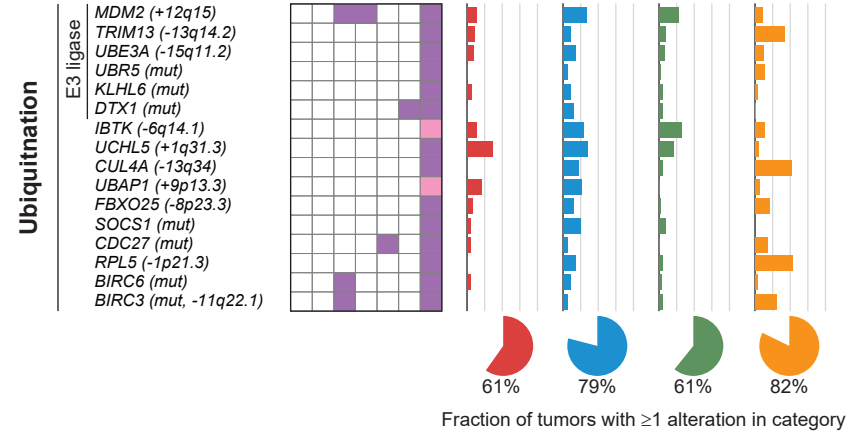

# Figure 4

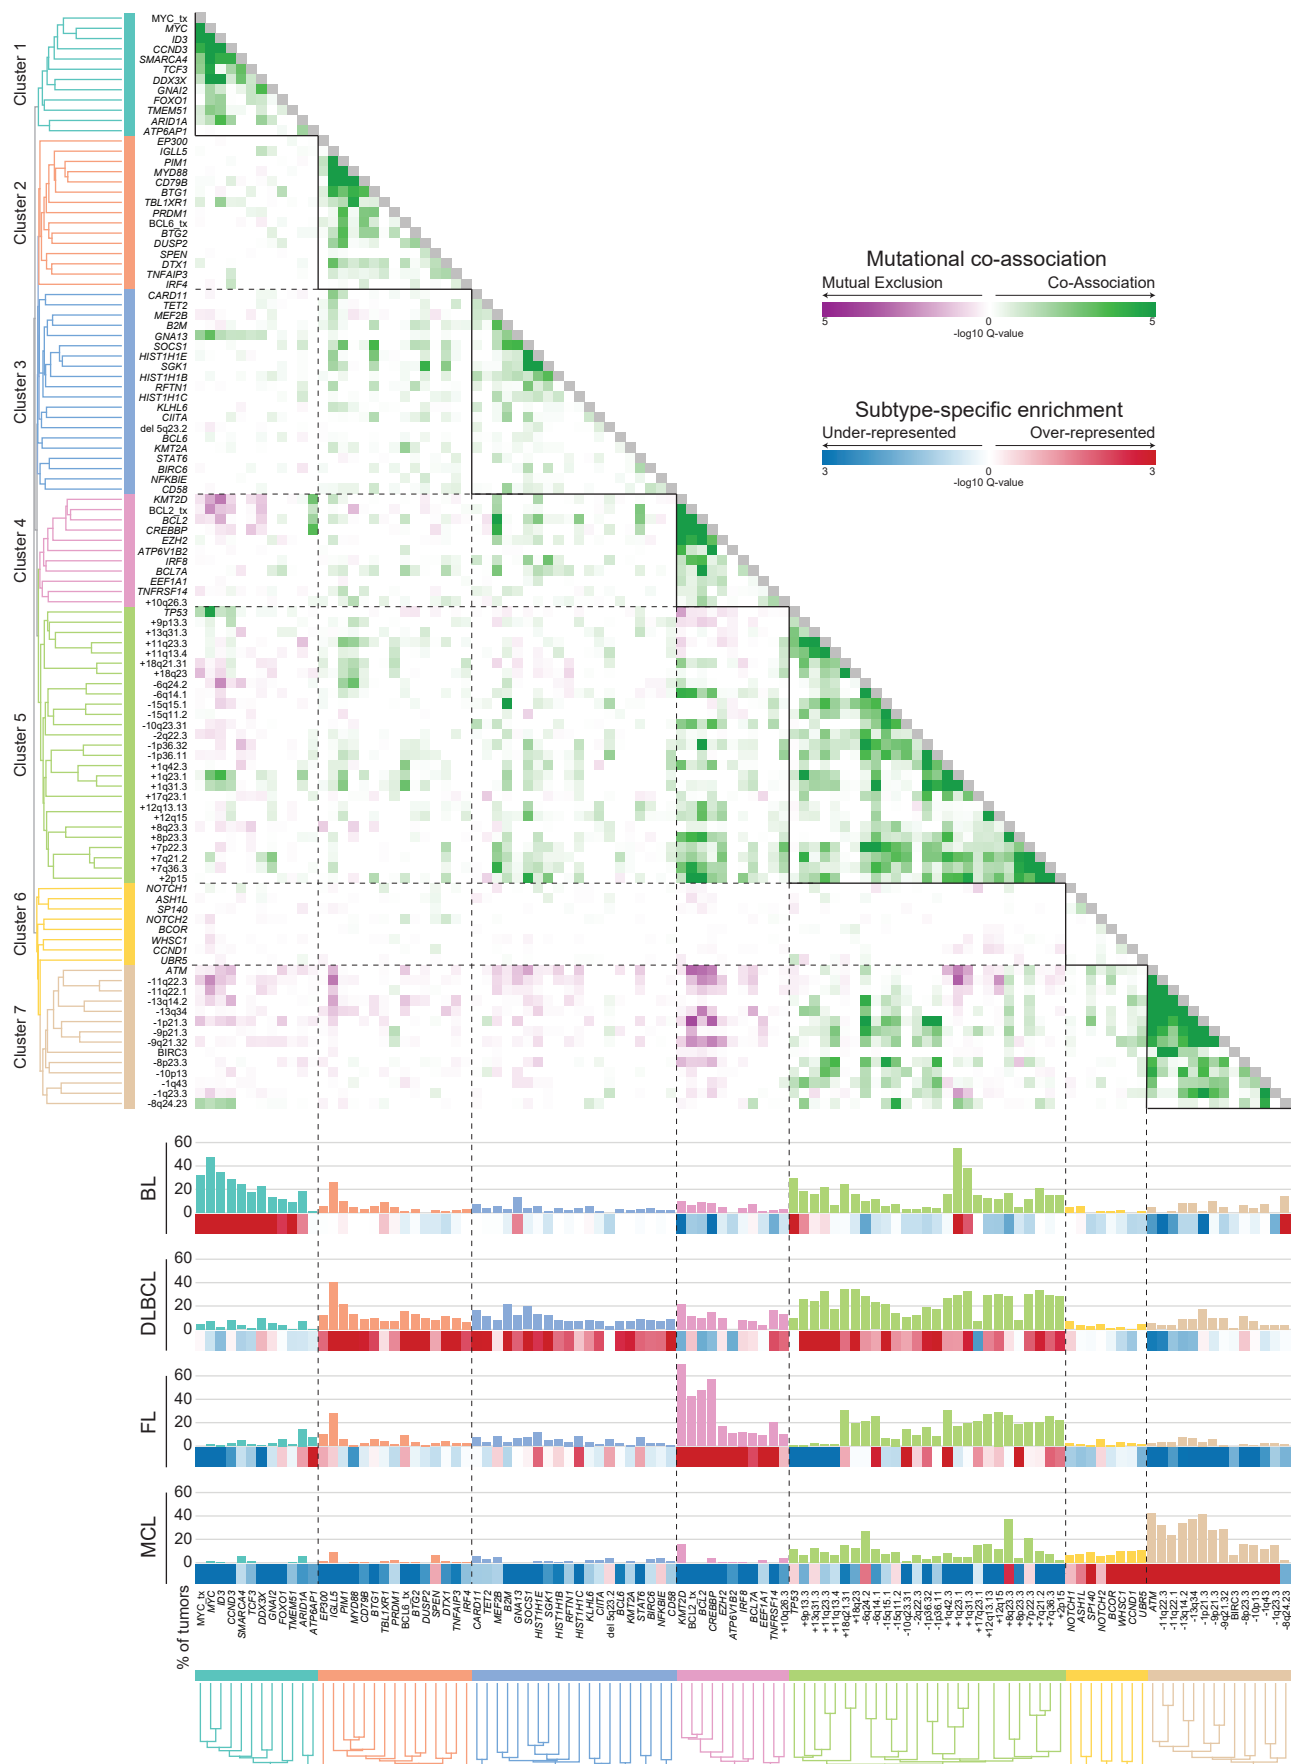

# Figure 5

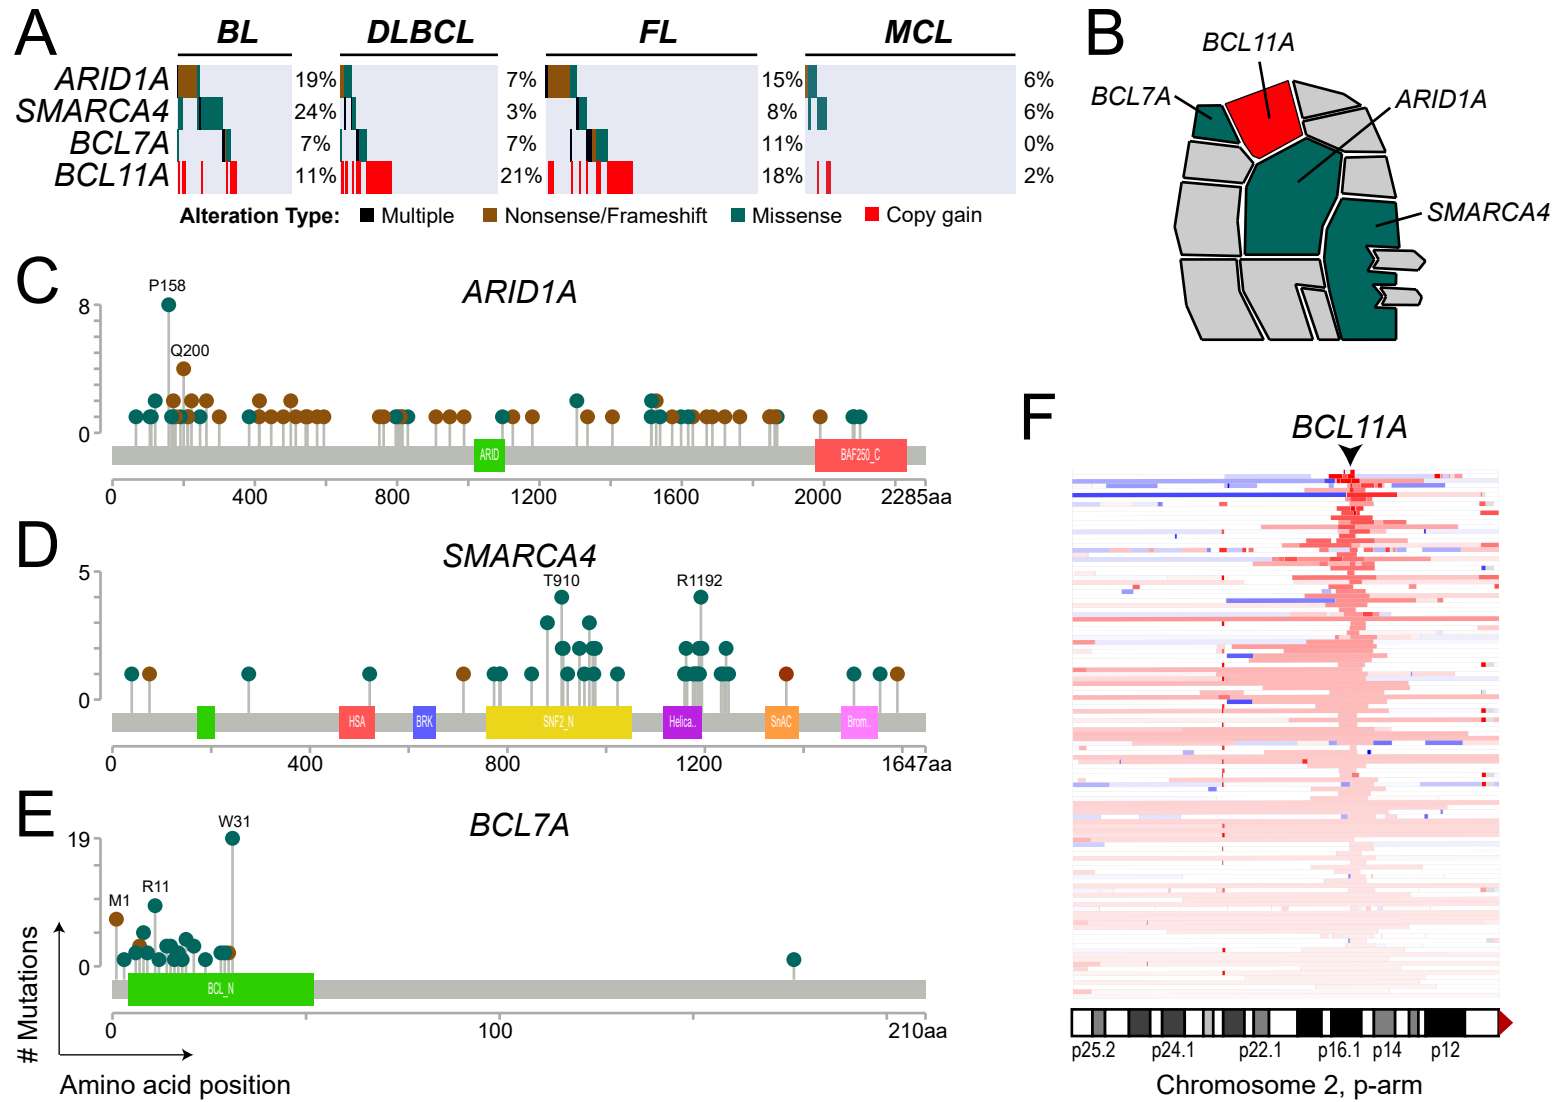

# Figure 5

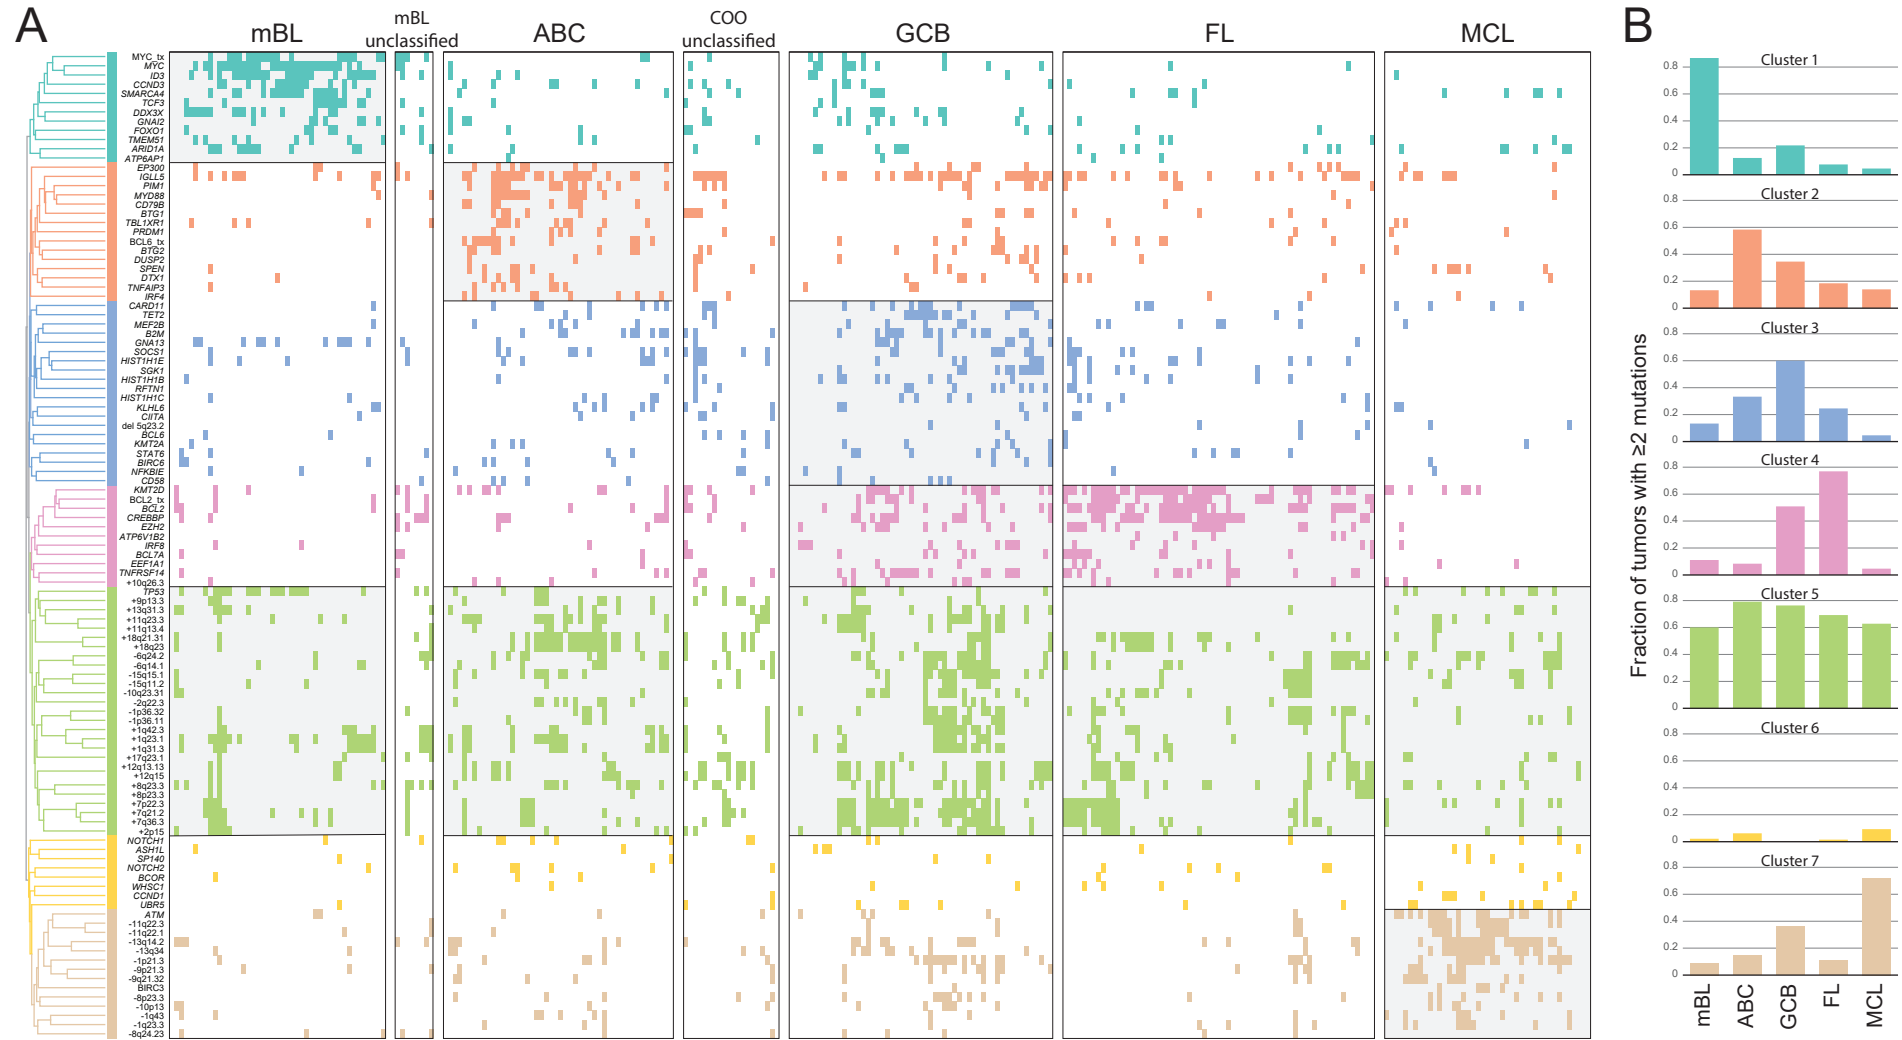

Source: https://www.biorxiv.org/content/10.1101/674259v2.full.pdf
